# Supplementary material for: TENT5 cytoplasmic noncanonical poly(A) polymerases regulate the innate immune response in animals
Source: PubMed Central journal article supplement — Sci Adv. 2022 Nov 16;8(46):eadd9468. doi: 10.1126/sciadv.add9468 (PMC9668313; doi:10.1126/sciadv.add9468), 2022-11-16
Supplement: sciadv.add9468_sm.pdf [file sciadv.add9468_sm.pdf]

Supplementary Materials for  
**TENT5 cytoplasmic noncanonical poly(A) polymerases regulate the innate  
immune response in animals**

Vladyslava Liudkovska *et al.*

Corresponding author: Andrzej Dziembowski, [adziembowski@iimcb.gov.pl](mailto:adziembowski@iimcb.gov.pl)

*Sci. Adv.* **8**, eadd9468 (2022)  
DOI: 10.1126/sciadv.add9468

**The PDF file includes:**

Figs. S1 to S7  
Tables S1 to S4  
Legends for data S1 to S6  
References

**Other Supplementary Material for this manuscript includes the following:**

Data S1 to S6



**Fig. S1. TENT-5 is a cytoplasmic ncPAP in worms.**

(A) upper panel: Multiple sequence alignment of TENT-5 and human TENT5A-D proteins. Residues critical for the TENT5 proteins catalytic activity are marked with red boxes. TENT5 ncPAPs contain NTase domain with catalytic triad ([DE]h[DE]h, h[DE]h) and PAP-associated domain, underlined in orange and violet, respectively, and shown schematically in the lower panel (based on (25)). (B) Northern blot detection of *RL* reporter mRNA using total RNA from mock-transfected 293T cells or cells transfected with constructs that express NHA-hsTENT5C<sup>WT</sup> (TENT5C WT, positive control), NHA-TENT-5<sup>WT</sup> (TENT-5 WT), or NHA-TENT-5<sup>D151A,D153A</sup> (TENT-5 MUT). Samples from two independent transfections are shown for TENT-5. In the cells transfected with NHA-hsTENT5C<sup>WT</sup> or NHA-TENT-5<sup>WT</sup> the *RL* mRNA migrates slowly, indicating its bigger length. Methylene blue staining of 18S rRNA serves as a loading control. (C) Northern blot detection of *RL* reporter mRNA using poly(A)<sup>+</sup> RNA isolated from 293T cells transfected as in B. Observed differences in *RL* mRNA gel-migration upon tethering of NHA-TENT-5<sup>WT</sup> resulted from mRNA polyadenylation, as revealed by the fact that *RL* mRNA from mock and NHA-TENT-5<sup>WT</sup>-transfected cells migrated equivalently following RNA treatment with RNase H in the presence of oligo(dT)<sub>25</sub>. Methylene blue staining serves as a loading control. (D) NHA-TENT-5<sup>WT</sup> tethering increases RL reporter protein levels. Western blot detection of RL from mock-transfected 293 cells or from cells transfected with constructs that express NHA-hsTENT5C<sup>WT</sup> (TENT5C WT, positive control), NHA-TENT-5<sup>WT</sup> (TENT-5 WT), or NHA-TENT-5<sup>D151A,D153A</sup> (TENT-5 MUT). Ponceau S staining serves as a loading control. (E) RT-qPCR quantification of *tent-5* mRNA levels in wild-type and *tent-5*(*rtt6*[*tent-5::gfp::3xflag*] *l*) knock-in strain. Data represent mean ± standard deviation (SD) of three biological replicates. ns – not significant (two-tailed t-test). (F) Anti-GFP immunoblot blot analysis of total protein lysate prepared from the *tent-5::gfp* worms. Total protein lysate from wild type was used as a negative control. Ponceau S staining of membrane serves as a loading control. (G) Representative fluorescence and DIC images of TENT-5-GFP expression. Scale bar is 20 μm. (H) Schematic of *tent-5* gene structure and mutant alleles. Exons are depicted as blue (*tent-5*), green (*gfp*), and brown (*3xflag*) boxes, UTRs as grey boxes, introns as lines. The approximate positions of triplets encoding catalytic residues are marked with orange boxes. Arrows correspond to the position of primers used for RT-qPCR. (I) RT-qPCR quantification of *tent-5* mRNA levels in L4 wild-type and mutant worms. Data represent mean ± SD of three biological replicates; \**P* ≤ 0.05; \*\**P* ≤ 0.01; \*\*\**P* ≤ 0.001 (two-tailed t-test). (J) Total brood size of wild-type and *tent-5*-deficient worms (n=10, average of two independent trials). Data represent mean ± SD; ns – not significant (two-tailed unpaired t-test). Analysis of the worms' body length (K) and width (L), track length (M), and centerpoint speed (N) with the WormLab software. 80 young adult worms per strain have been analyzed. Data represent mean ± SD; ns – not significant (two-tailed unpaired t-test with Welch's correction).

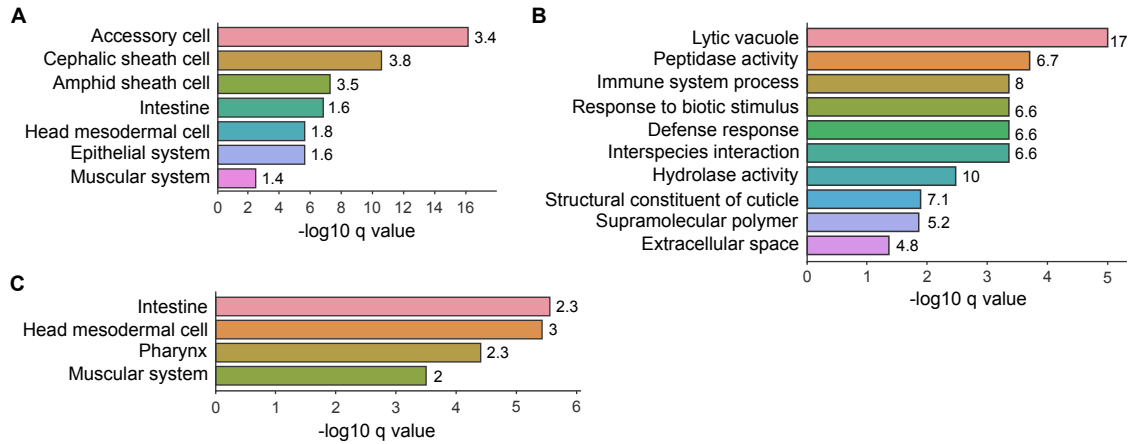

**Fig. S2. Loss of *tent-5* leads to the downregulation of genes that encode innate immune effectors.** (A and C) Tissue enrichment analysis of downregulated genes ( $\log_2FC < -\log_2(1.5)$ , RNA-seq) (A) and proteins ( $p$  value  $< 0.05$ , Mass Spectrometry) (C) which levels were decreased in *tent-5(tm3504)* mutant compared to the wild-type worms. (B) Overrepresented functional GO terms of proteins with decreased abundance in *tent-5*-deficient worms in comparison to the wild type (Mass Spectrometry). Numbers on the right indicate the enrichment fold change for each term (observed/expected genes).

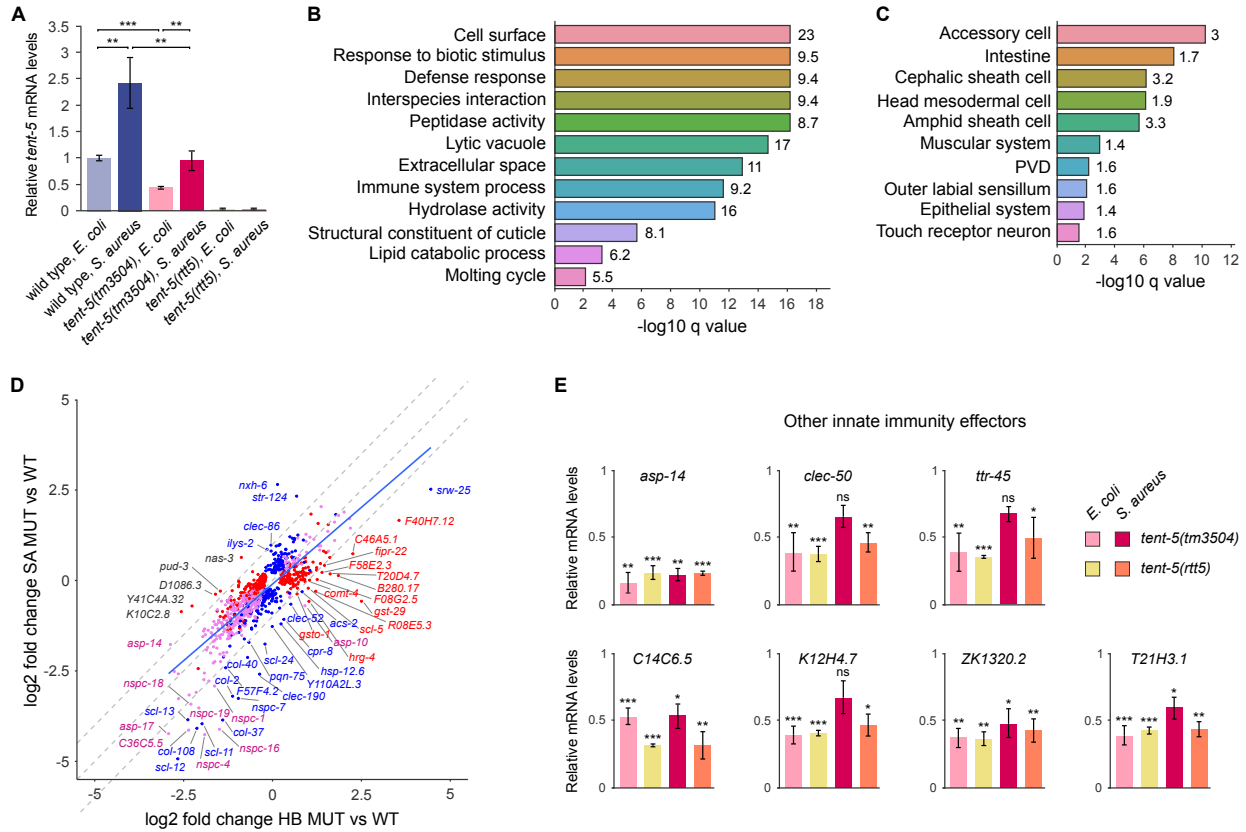

**Fig. S3. TENT-5 deficiency leads to the downregulation of genes that encode innate immune effectors.** (A) RT-qPCR analysis of *tent-5* expression in wild type, *tent-5(tm3504)*, and *tent-5(rtt5)* worms that were exposed to *S. aureus* or control *E. coli* for 8 hours. Relative *tent-5* mRNA level was normalized to *act-1* and wild type. Data represent mean  $\pm$  SD of three biological replicates; \* $P \leq 0.05$ ; \*\* $P \leq 0.01$ ; \*\*\* $P \leq 0.001$  (two-tailed t-test). (B and C) Overrepresented functional GO and TEA terms of genes downregulated ( $\log_2\text{FC} < -\log_2(1.5)$ ) in *tent-5(tm3504)* mutant compared to wild type upon infection of L4 worms with *S. aureus* for 8 hours. Numbers on the right indicate the enrichment fold change for each term. (D) Scatter plot illustrates a comparison of the differential expression of genes ( $|\log_2\text{FC}| > 0$ , FDR < 0.05) between mutant (MUT) and wild type (WT) in infected (SA) and non-infected (HB) animals. Red and blue dots indicate genes differentially expressed in wild-type and mutant worms, respectively. Dots in magenta indicate the common part. The middle diagonal dashed line shows the equal response of both genotypes, and two additional dashed lines show the borders of the area where the response is  $\pm 1 \log_2\text{FC}$ . The solid blue line shows a linear trend created using the linear regression model for all data points. (E) RT-qPCR analysis of relative levels of mRNA expression in two *tent-5*-deficient worm strains grown on *E. coli* or exposed to *S. aureus* for 8 hours. Relative abundance of mRNAs was normalized to *act-1* and wild type. Data represent mean  $\pm$  SD of three biological replicates; ns – not significant; \* $P \leq 0.05$ ; \*\* $P \leq 0.01$ ; \*\*\* $P \leq 0.001$  (two-tailed t-test).

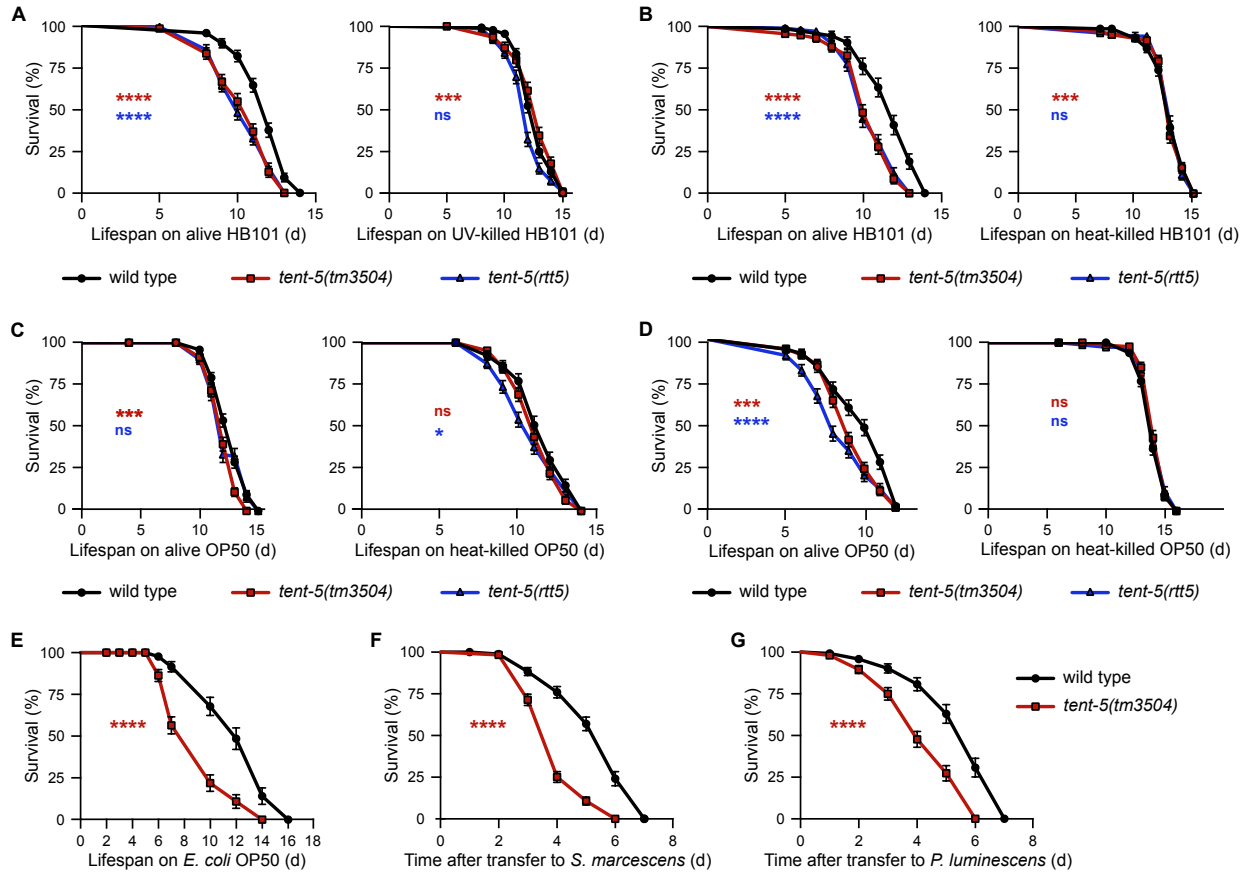

**Fig. S4. TENT-5 is required for the host defense against various bacterial strains. (A-D)** The lifespan of wild type, *tent-5(tm3504)*, and *tent-5(rtt5)* worms grown at 25°C on plates seeded with alive or UV-killed *E. coli* HB101 (A), alive or heat-killed *E. coli* HB101 (B), and alive or heat-killed *E. coli* OP50 (C and D). For these experiments, NGM plates contained FUdR. \* $P < 0.05$ ; \*\* $P < 0.01$ ; \*\*\* $P < 0.001$ ; \*\*\*\* $P < 0.0001$ ; ns – not significant (Log-Rank test). (E-G) Survival of wild type and *tent-5(tm3504)* worms grown on *E. coli* OP50 (E) or infected with *S. marcescens* (F) and *P. luminescens* (G). Experiments presented in E-G are representative of at least two independent trials; \* $P < 0.05$ ; \*\* $P < 0.01$ ; \*\*\* $P < 0.001$ ; \*\*\*\* $P < 0.0001$ ; ns – not significant (Log-Rank test). Survival statistics related to lifespan and survival assays can be found in table S1.

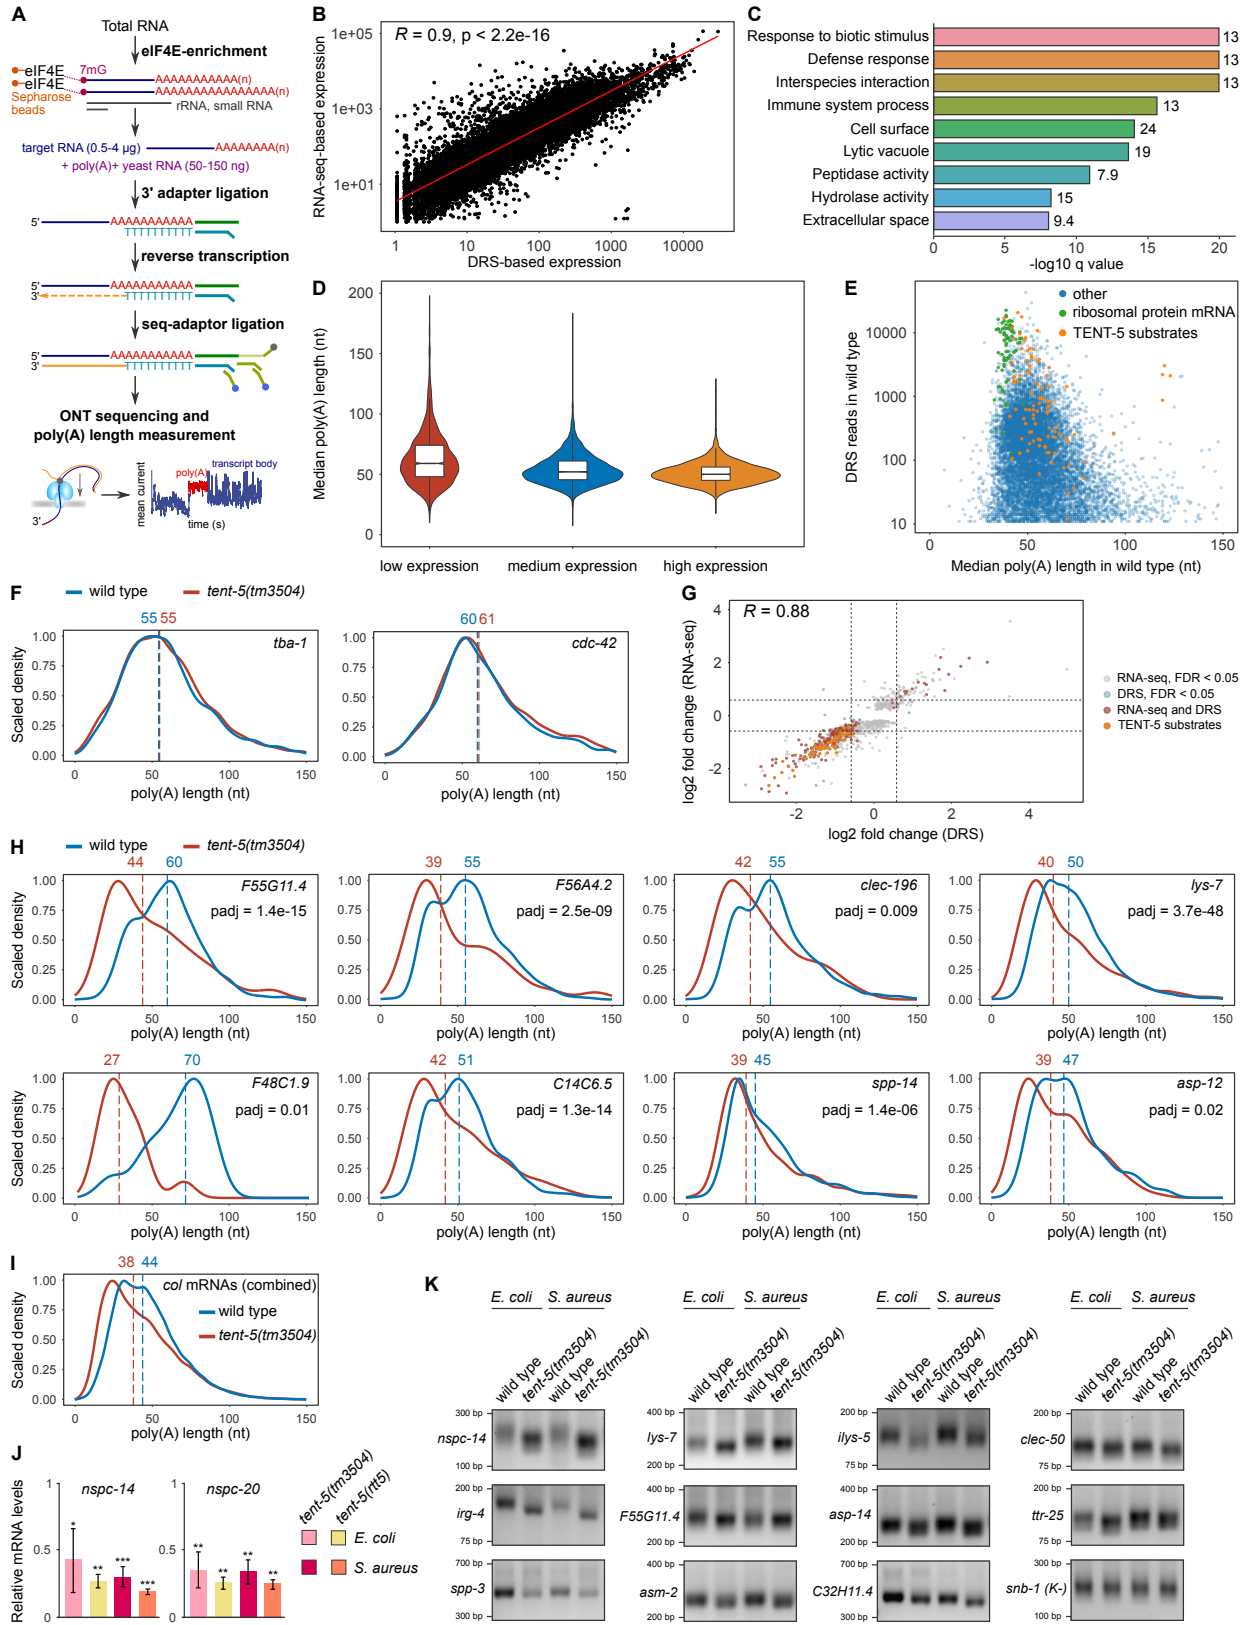

**Fig. S5. Transcripts downregulated in the *tent-5*-deficient mutants are the direct targets for polyadenylation by TENT-5.** (A) Schematic of library preparation for Direct RNA sequencing. (B) Correlation between gene expression levels in the wild-type worms measured by DRS and RNA-seq. The red line represents a linear regression line. Genes with normalized expression of minimum 1 were included in the analysis (n=13,632). Values of Pearson's correlation coefficient and statistical test are indicated on the plot. (C) Overrepresented functional GO terms of transcripts significantly downregulated ( $\log_2FC < -\log_2(1.5)$ ) in *tent-5(tm3504)* mutant in comparison to the wild-type worms. Numbers on the right indicate the enrichment fold change for each term. (D) Violin plots showing the median poly(A) tail length distribution for genes with low (first quartile), medium (interquartile range) and highly (third quartile) expressed mRNA in the wild-type worms. (E) Plot illustrating the relationship between median poly(A) tail length and mRNA expression in wild-type worms. TENT-5 substrates are indicated in orange, mRNAs that encode ribosomal proteins are marked in green. (F-I) DRS-based poly(A) length profiling of mRNAs that encode established reference genes (F), indicated innate immune effectors (H) and collagens (I). Shown are density distribution plots scaled to 1. Vertical dashed lines represent median poly(A) lengths (nt); padj values (Wilcoxon test) are shown on the top right corner below the mRNA ID. (G) Scatter plot illustrates a comparison of the differential expression of genes ( $FDR < 0.05$ ) between *tent-5* mutant and wild-type worms, as identified by RNA-seq and DRS. Red dots indicate genes differentially expressed in wild-type and mutant worms according to both sequencing methods (n=231), orange dots present TENT-5 substrates (n=96). Dashed lines mark the threshold of the  $\log_2(1.5)$  fold change. Pearson's correlation test. (J) RT-qPCR analysis of relative levels of *nspc-14* and *nspc-20* mRNA expression in two *tent-5*-deficient worm strains grown on *E. coli* or exposed to *S. aureus* for 8 hours. Relative abundance of mRNAs was normalized to *act-1* and wild type. Data represent mean  $\pm$  SD of three biological replicates; \* $P \leq 0.05$ ; \*\* $P \leq 0.01$ ; \*\*\* $P \leq 0.001$  (two-tailed t-test). (K) Poly(A) tail PCR tests of selected TENT-5-regulated transcripts. Samples were prepared from *tent-5(tm3504)* mutant and wild-type worms infected with *S. aureus* for 8 hours or grown on control *E. coli*. PCR products were analyzed on 2% agarose gels.



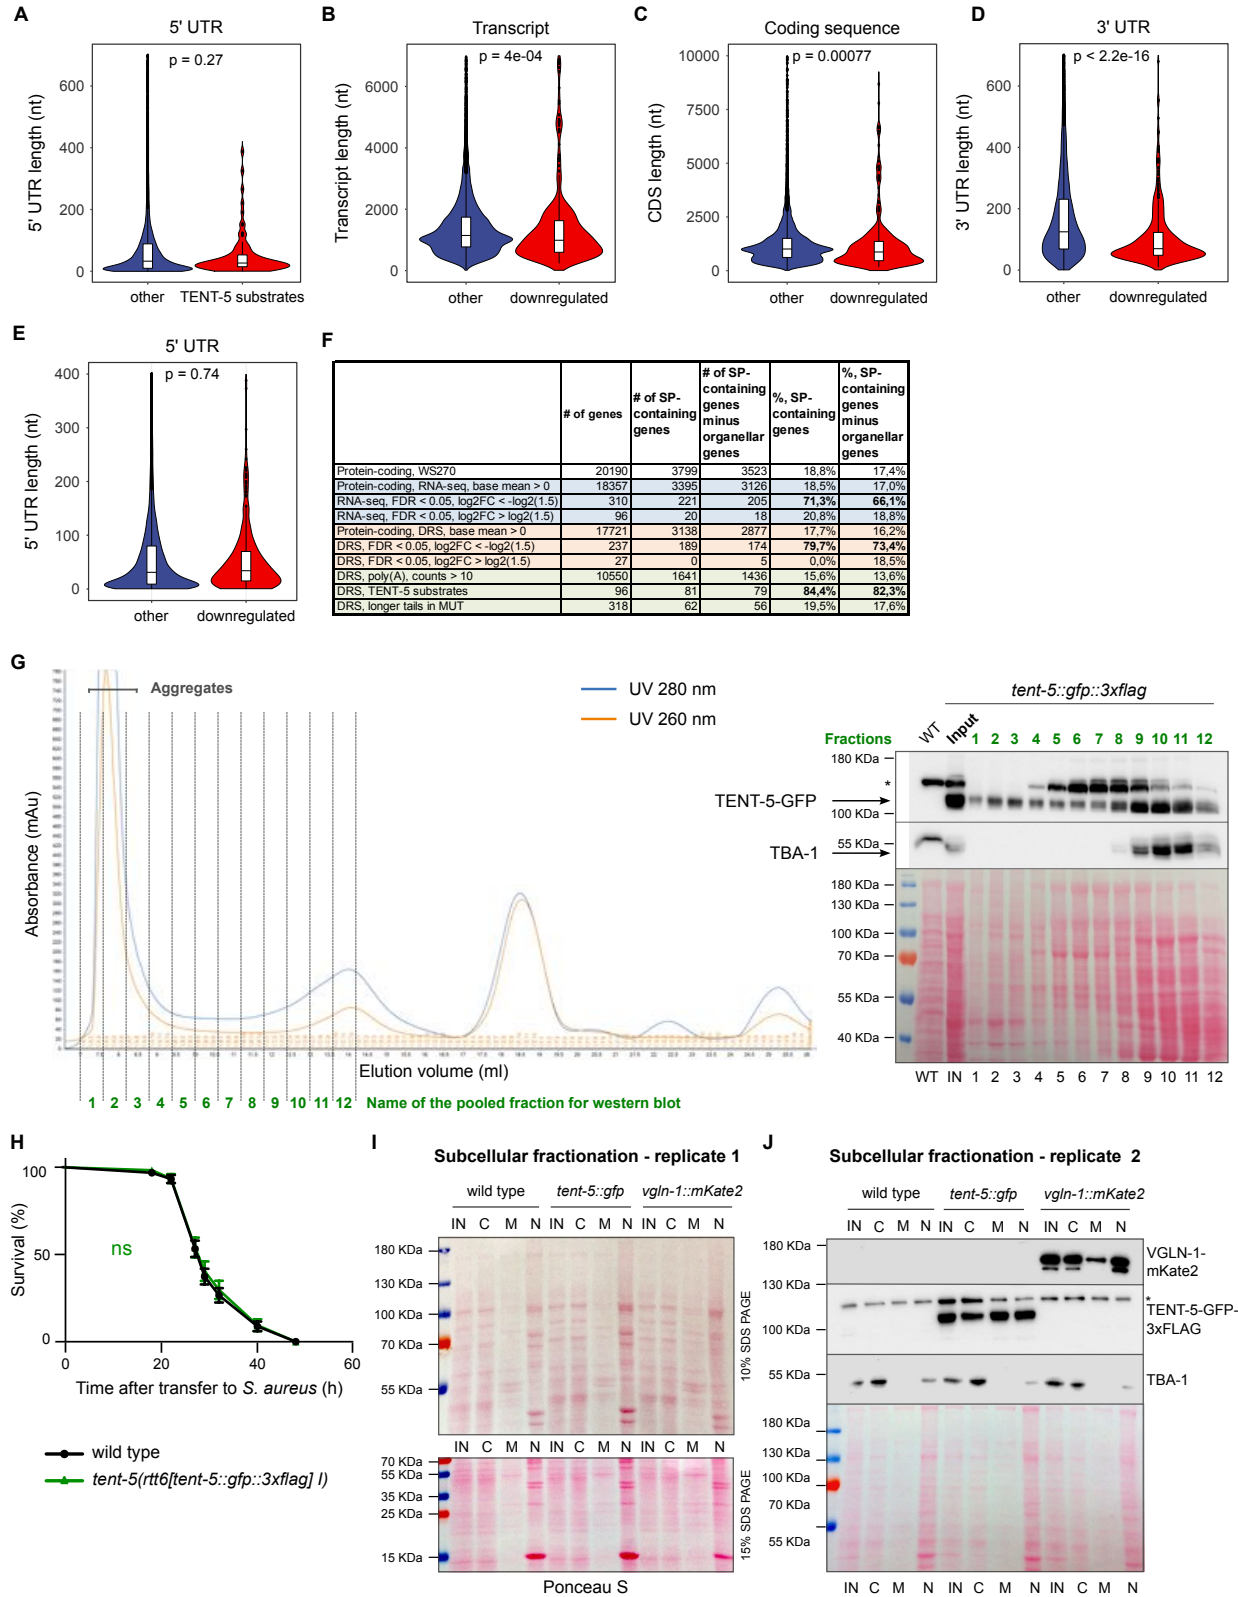

**Fig. S6. TENT-5 regulates mRNAs that encode secreted proteins.** (A) Violin plot showing length distribution of 5' UTRs of TENT-5 substrates (n=96) compared to other transcripts

identified by DRS (n=16,568); (p value, Wilcoxon test). Violin plots illustrating length distribution of transcripts (**B**), coding sequences (**C**), 3' UTRs (**D**), and 5' UTRs (**E**) of transcripts, whose expression levels were decreased at least 1.5-fold in *tent-5(tm3504)* mutant worms (n=308) compared to other transcripts identified by RNA-seq (n=18,229); (p value, Wilcoxon test). (**F**) Fractions of genes that encode secreted proteins (%) as defined by (60) across indicated datasets. For more details also see data S4. (**G**) The chromatography analysis of total protein extracts from the *tent-5(rtt6)* worms on Superdex 200 (on the left) followed by western blot analysis (on the right). Fractions pooled for western blot analysis are indicated with dotted lines and numbered in green. Most of TENT-5-GFP is present in the fraction corresponding to the TENT-5-GFP molecular weight (pooled fractions 9-11) and a small amount of TENT-5 can be found in macromolecular complexes or aggregates (pooled fractions 1-3). Anti-tubulin (TBA-1) antibodies were used as control, and Ponceau S staining illustrates the relative amount of protein in each pooled fraction. (**H**) Survival of wild-type and *tent-5::gfp::3xflag* worms infected with *S. aureus*; ns – not significant (Log-Rank test). (**I-J**) Subcellular fractionation of proteins isolated from wild-type, *tent-5::gfp::3xflag*, and *vglN-1::mKate2::3xmyc* strains. (**I**) Ponceau S staining of the whole membrane used for the western blot presented in Fig. 6F (10% SDS PAGE) and membrane containing the same extracts resolved on the 15% SDS PAGE indicating successful fractionation of proteins. (**J**) Second biological replicate of subcellular fractionation shown in Fig. 6F. Anti-tubulin (TBA-1) and anti-RFP (VGLN-1-mKate2) antibodies and Ponceau S staining were used as fractionation controls. IN – input sample, C – cytoplasmic fraction, M – membrane fraction, N – nuclear fraction. Asterisks indicate nonspecific bands.

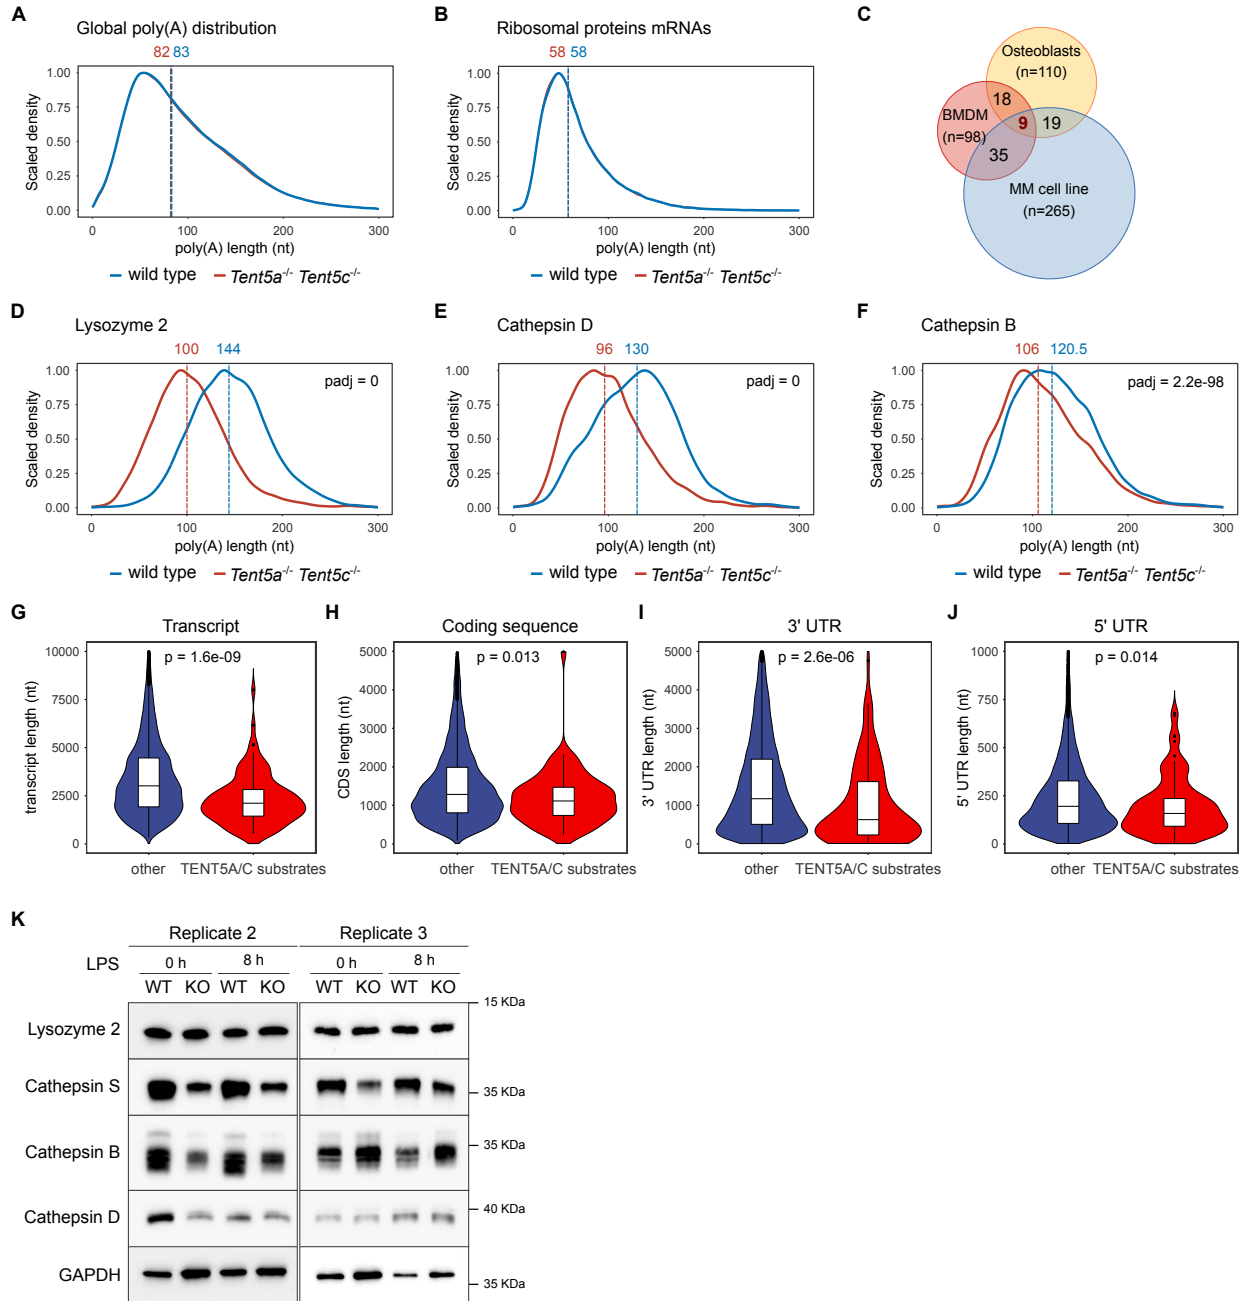

**Fig. S7. The role of TENT-5 in innate immunity is evolutionarily conserved.** DRS-based poly(A) length profiling of mRNA isolated from *Tent5a<sup>-/-</sup> Tent5c<sup>-/-</sup>* and wild-type BMDM. Shown are density distribution plots for all transcripts (**A**), mRNAs encoding ribosomal proteins (**B**), *Lyz2* (**D**), *Ctsd* (**E**), and *Ctsb* (**F**) mRNAs scaled to 1. Vertical dashed lines represent median poly(A) lengths (nt); for *Lyz2*, *Ctsd*, and *Ctsb* transcripts padj values (Wilcoxon test) are shown. (**C**) Overlap between TENT5A/C molecular substrates identified in BMDM (red, DRS; this study), osteoblasts (yellow, DRS) (26), and multiple myeloma cell lines (blue, RNA-seq after RNA poly(A) length fractionation) (21). (**G-I**) Violin plots showing length distribution of transcripts (**G**), coding sequences (**H**), 3' UTRs (**I**), and 5' UTRs (**J**) of TENT5A/C substrates (n=98) compared to all other transcripts identified by DRS (n=25,678); (p value, Wilcoxon test).

**(K)** Western blots showing that the lack of TENT5A and TENT5C leads to the lower abundance of LYZ2, CTSS, CTSD, and CTSB both in unstimulated (LPS, 0 hours) and stimulated (LPS, 8 hours) BMDM derived from mutant compared to the wild-type mouse. GAPDH serves as a loading control. Shown are replicates 2 and 3.

**Table S1. Survival statistics related to lifespan and pathogenesis assays.**

MS: median survival

N: total number of animals that died

P value: compared to the wild type, based on Log-rank (Mantel-Cox) test

|                                                                                         | Replicate 1 |     |            | Replicate 2 |     |            | Replicate 3 |     |            |
|-----------------------------------------------------------------------------------------|-------------|-----|------------|-------------|-----|------------|-------------|-----|------------|
|                                                                                         | MS, days    | N   | p value    | MS, days    | N   | p value    | MS, days    | N   | p value    |
| <b><i>E. coli</i> HB101, 20°C, FUDR (Fig. 4A)</b>                                       |             |     |            |             |     |            |             |     |            |
| wild type                                                                               | 26          | 80  |            | 28          | 91  |            |             |     |            |
| <i>tent-5(tm3504)</i>                                                                   | 19          | 97  | p < 0.0001 | 26          | 84  | 0.0091     |             |     |            |
| <i>tent-5(rtt5)</i>                                                                     | 26          | 82  | ns         | 28          | 110 | ns         |             |     |            |
| <b><i>E. coli</i> HB101, 25°C, FUDR (Fig. 4B)</b>                                       |             |     |            |             |     |            |             |     |            |
| wild type                                                                               | 12          | 151 |            | 11          | 179 |            | 14          | 104 |            |
| <i>tent-5(tm3504)</i>                                                                   | 10          | 129 | 0.0042     | 10          | 176 | p < 0.0001 | 12          | 113 | p < 0.0001 |
| <i>tent-5(rtt5)</i>                                                                     | 12          | 131 | ns         | 10          | 184 | p < 0.0001 | 12          | 138 | p < 0.0001 |
| <b><i>E. coli</i> HB101 alive, 25°C, FUDR, control to UV-killed HB101 (Fig. S4A)</b>    |             |     |            |             |     |            |             |     |            |
| wild type                                                                               | 12          | 132 |            |             |     |            |             |     |            |
| <i>tent-5(tm3504)</i>                                                                   | 11          | 115 | p < 0.0001 |             |     |            |             |     |            |
| <i>tent-5(rtt5)</i>                                                                     | 10          | 138 | p < 0.0001 |             |     |            |             |     |            |
| <b><i>E. coli</i> HB101 UV-killed, 25°C, FUDR (Fig. S4A)</b>                            |             |     |            |             |     |            |             |     |            |
| wild type                                                                               | 13          | 134 |            |             |     |            |             |     |            |
| <i>tent-5(tm3504)</i>                                                                   | 13          | 95  | ns         |             |     |            |             |     |            |
| <i>tent-5(rtt5)</i>                                                                     | 12          | 130 | 0,001      |             |     |            |             |     |            |
| <b><i>E. coli</i> HB101 alive, 25°C, FUDR, control to heat-killed HB101 (Fig. S4B)</b>  |             |     |            |             |     |            |             |     |            |
| wild type                                                                               | 11          | 113 |            |             |     |            |             |     |            |
| <i>tent-5(tm3504)</i>                                                                   | 11          | 139 | p < 0.0001 |             |     |            |             |     |            |
| <i>tent-5(rtt5)</i>                                                                     | 10          | 149 | p < 0.0001 |             |     |            |             |     |            |
| <b><i>E. coli</i> HB101 heat-killed, 25°C, FUDR (Fig. S4B)</b>                          |             |     |            |             |     |            |             |     |            |
| wild type                                                                               | 13          | 154 |            |             |     |            |             |     |            |
| <i>tent-5(tm3504)</i>                                                                   | 13          | 144 | ns         |             |     |            |             |     |            |
| <i>tent-5(rtt5)</i>                                                                     | 13          | 107 | ns         |             |     |            |             |     |            |
| <b><i>E. coli</i> OP50 alive, 25°C, FUDR, control to heat-killed HB101 (Fig. S4C-D)</b> |             |     |            |             |     |            |             |     |            |
| wild type                                                                               | 13          | 170 |            | 10          | 120 |            |             |     |            |
| <i>tent-5(tm3504)</i>                                                                   | 12          | 144 | p < 0.0001 | 9           | 143 | 0,0004     |             |     |            |
| <i>tent-5(rtt5)</i>                                                                     | 12          | 104 | ns         | 8           | 126 | p < 0.0001 |             |     |            |
| <b><i>E. coli</i> OP50 heat-killed, 25°C, FUDR (Fig. S4C-D)</b>                         |             |     |            |             |     |            |             |     |            |
| wild type                                                                               | 12          | 100 |            | 14          | 177 |            |             |     |            |
| <i>tent-5(tm3504)</i>                                                                   | 11          | 130 | ns         | 14          | 146 | ns         |             |     |            |
| <i>tent-5(rtt5)</i>                                                                     | 11          | 138 | 0,0414     | 14          | 161 | ns         |             |     |            |
| <b><i>S. aureus</i> (Fig. 4D)</b>                                                       |             |     |            |             |     |            |             |     |            |
| wild type                                                                               | 40          | 75  |            | 40          | 86  |            | 38          | 103 |            |
| <i>tent-5(tm3504)</i>                                                                   | 36          | 111 | p < 0.0001 | 40          | 107 | p < 0.0001 | 31          | 144 | 0.0002     |
| <i>tent-5(rtt5)</i>                                                                     | 36          | 104 | p < 0.0001 | 40          | 109 | p < 0.0001 | 31          | 127 | 0.0010     |

| <b><i>P. aeruginosa</i> PAOI (Fig. 4E)</b>        |    |     |            |    |     |            |   |    |            |
|---------------------------------------------------|----|-----|------------|----|-----|------------|---|----|------------|
| wild type                                         | 7  | 102 |            | 6  | 132 |            | 6 | 95 |            |
| <i>tent-5(tm3504)</i>                             | 6  | 110 | p < 0.0001 | 5  | 142 | p < 0.0001 | 5 | 90 | p < 0.0001 |
| <i>tent-5(rtt5)</i>                               | 5  | 94  | p < 0.0001 | 5  | 161 | p < 0.0001 | 5 | 97 | p < 0.0001 |
| <b><i>E. coli</i> OP50, 25°C (Fig. S4E)</b>       |    |     |            |    |     |            |   |    |            |
| wild type                                         | 13 | 92  |            | 12 | 101 |            |   |    |            |
| <i>tent-5(tm3504)</i>                             | 8  | 127 | p < 0.0001 | 10 | 116 | p < 0.0001 |   |    |            |
| <b><i>S. marcescens</i> Db10, 25°C (Fig. S4F)</b> |    |     |            |    |     |            |   |    |            |
| wild type                                         | 6  | 115 |            | 4  | 84  |            |   |    |            |
| <i>tent-5(tm3504)</i>                             | 4  | 173 | p < 0.0001 | 3  | 121 | p < 0.0001 |   |    |            |
| <b><i>P. luminescens</i>, 25°C (Fig. S4G)</b>     |    |     |            |    |     |            |   |    |            |
| wild type                                         | 6  | 90  |            | 4  | 96  |            |   |    |            |
| <i>tent-5(tm3504)</i>                             | 4  | 103 | p < 0.0001 | 3  | 112 | p < 0.0001 |   |    |            |

**Table S2. List of oligonucleotides and sgRNAs used in this study.**

| ID                                                                                              | Name                                       | Sequence 5' to 3'                                                          | Description                                                                                     |
|-------------------------------------------------------------------------------------------------|--------------------------------------------|----------------------------------------------------------------------------|-------------------------------------------------------------------------------------------------|
| <b>Primers used for PCR genotyping and sequencing of <i>C. elegans</i> strains (this study)</b> |                                            |                                                                            |                                                                                                 |
| VL001                                                                                           | tent-5-wt-Rev                              | tcaggttccactgacaatg                                                        | Used for:<br><i>tent-5(tm3504)</i> ,<br><i>tent-5(rtt5)</i> ,<br><i>tent-5(rtt6)</i> ,<br>ADZ47 |
| VL002                                                                                           | tent-5-ko-Rev                              | tgatctcgacctgatattcc                                                       |                                                                                                 |
| VL003                                                                                           | tent-5-Fw                                  | gttcacactcgtccaactc                                                        |                                                                                                 |
| VL318                                                                                           | tent-5-crispr-Fw                           | gatcgtgtcgcattccagg                                                        |                                                                                                 |
| VL319                                                                                           | tent-5-crispr-Rev                          | gtgccgacaattgatgggtg                                                       |                                                                                                 |
| VL340                                                                                           | tent-5-crispr-Fw2                          | acgtaagatctccgatccactaattcaaaatttac                                        | Used for<br><i>tent-5(rtt6)</i> ,<br>ADZ47                                                      |
| VL355                                                                                           | tent-5-crispr-Fw3                          | ggtcttcatctggatcagatac                                                     |                                                                                                 |
| VL356                                                                                           | tent-5-crispr-Fw4                          | caaggtaaagttaaacagttc                                                      |                                                                                                 |
| VL357                                                                                           | tent-5-crispr-Rev2                         | ctttaaatttcagattttgatgta                                                   |                                                                                                 |
| <b>Primers used for cloning (this study)</b>                                                    |                                            |                                                                            |                                                                                                 |
| VL342                                                                                           | sgRNA-universal-Fw                         | aagcatgcaattttgagaaactc                                                    | Cloning of<br>pDD162-<br><i>sgRNA425</i><br>(pVL060)                                            |
| VL343                                                                                           | sgRNA-universal-Rev                        | gagtgcaccatagcgggtgtaa                                                     |                                                                                                 |
| VL344                                                                                           | sgRNA425-Rev1                              | tgtagtctcatctggggcacaagacatctcgcaatagg                                     |                                                                                                 |
| VL345                                                                                           | sgRNA425-Fw1                               | tgccaccagatcgagctacagtttagagctagaatagcaagt                                 |                                                                                                 |
| VL346                                                                                           | sgRNA-universal-seq                        | cgttttacaacgctcgtgactggg                                                   |                                                                                                 |
| VL386                                                                                           | sgRNA-universal-Fw2                        | ctataatttgcaccttttcaaaaaagcatgcaattttgagaa<br>actc                         |                                                                                                 |
| VL387                                                                                           | sgRNA-universal-<br>Rev2                   | cggcatcagagcagattgtactgagagtgccaccatagcggg<br>tgtaa                        |                                                                                                 |
| VL347                                                                                           | tent-5-gfp-5'arm-Rev<br>(silent mutations) | catcgatgctcctgaggctcccgatgctccgatgactggaatc<br>caagttgcagcgtccggcggaagtaga | Cloning of<br>pDD282-<br><i>tent-5::</i><br><i>gfp::3xflag</i><br>(pVL062)                      |
| VL348                                                                                           | tent-5-gfp-5'arm-Fw                        | acgttgtaaaacgacggccagtcgccggcatatgctgtgaa<br>catgattgatcgtgctgc            |                                                                                                 |
| VL349                                                                                           | tent-5-gfp-3'arm-Fw                        | ctgattacaaggatgacgatgacaagagatgatccaattga<br>acctctcccctcttac              |                                                                                                 |
| VL350                                                                                           | tent-5-gfp-3'arm-Rev                       | ggaaacagctatgacctgttatcgattccagattttgatgtat<br>aaactcgtaggaaatatacag       |                                                                                                 |
| VL364                                                                                           | sgRNA-456-F                                | cgttctttaccaacgacgaggttttagagctagaatagcaagt                                | Cloning of<br>pDD162-<br><i>sgRNA456</i><br>(pVL069)                                            |
| VL365                                                                                           | sgRNA-456-R                                | ctcgtcgttgtaaaagaacgcaagacatctcgcaatagg                                    |                                                                                                 |
| VL366                                                                                           | vglN-1-mKate2-5arm-R                       | tatgaccatgattacgccaagctataaaactccgaactatgatgac                             | Cloning of<br>pDD287-<br><i>vglN-1::</i><br><i>mKate2::3xmyc</i><br>(pVL070)                    |
| VL367                                                                                           | vglN-1-mKate2-5arm-F                       | catcgatgctcctgaggctcccgatgctcccaacgacgaga<br>ggatcccaagca                  |                                                                                                 |
| VL368                                                                                           | vglN-1-mKate2-3arm-F                       | ctcgagcagaagttgatcagcaggaagactgtaaagaac<br>gttcgaatctggatgattca            |                                                                                                 |
| VL369                                                                                           | vglN-1-mKate2-3arm-R                       | ggaaacagctatgacctgttatcgatttctcacatgtacatt<br>tagcctacatc                  |                                                                                                 |
| 21                                                                                              | NHATENT-5-Fw                               | ctagagtcgacatgctggaagacgttcccg                                             | Cloning of pCI-<br><i>NHA-tent-5</i>                                                            |
| 23                                                                                              | NHATENT-5-Rev                              | gggaagcggccgctcagatgactggaatccatg                                          |                                                                                                 |
| <b>Primers for RT-qPCR analysis (this study)</b>                                                |                                            |                                                                            |                                                                                                 |
| VL031                                                                                           | q-tent-5-Fw                                | ggcaacttccaacaatctcc                                                       | Efficiency:<br>1.93                                                                             |
| VL032                                                                                           | q-tent-5-Rev                               | gaagaggctacaaatgatgcgg                                                     |                                                                                                 |
| VL453                                                                                           | q-tent-5-Fw2                               | gtgctcccgtcttctcatcg                                                       | 2.0                                                                                             |
| VL454                                                                                           | q-tent-5-Rev2                              | ccattgatcgtaaagtggtccc                                                     |                                                                                                 |
| VL033                                                                                           | q-act-1-Fw                                 | gctggacgtgatcttactgattacc                                                  | 1.95                                                                                            |

|                                                        |                |                                                                                                                        |                       |
|--------------------------------------------------------|----------------|------------------------------------------------------------------------------------------------------------------------|-----------------------|
| VL034                                                  | q-act-1-Rev    | gtagcagagcttctccttgatgctc                                                                                              |                       |
| VL096                                                  | q-ily5-5-Fw    | tgccctggaagagatgtgctg                                                                                                  | 1.96                  |
| VL097                                                  | q-ily5-5-Rev   | tgcaactgagacttgtagcgg                                                                                                  |                       |
| VL101                                                  | q-spp-14-Fw    | gaccacctctgccttctgg                                                                                                    | 2.0                   |
| VL102                                                  | q-spp-14-Rev   | gcattgtcctgttgctgg                                                                                                     |                       |
| VL104                                                  | q-spp-3-Fw     | gtcgacgctgaatgcaagaag                                                                                                  | 1.93                  |
| VL105                                                  | q-spp-3-Rev    | ttgggtcgagcttggtgctc                                                                                                   |                       |
| VL108                                                  | q-clec-160-Fw  | ggcagcaatgcagtatggac                                                                                                   | 2.0                   |
| VL109                                                  | q-clec-160-Rev | acgctcgtctagaaatcggac                                                                                                  |                       |
| VL111                                                  | q-clec-50-Fw   | accgattccaactacctgcc                                                                                                   | 1.98                  |
| VL112                                                  | q-clec-50-Rev  | tccatccttggtcgcaagac                                                                                                   |                       |
| VL116                                                  | q-irg-4-Fw     | tcggtcgaaaccaattccc                                                                                                    | 1.92                  |
| VL117                                                  | q-irg-4-Rev    | aaattggatcgagcgcagcac                                                                                                  |                       |
| VL119                                                  | q-F55G11.4-Fw  | tggtgcatctattgggcagg                                                                                                   | 1.92                  |
| VL120                                                  | q-F55G11.4-Rev | ctcctggtgcagcgtatcc                                                                                                    |                       |
| VL122                                                  | q-irg-5-Fw     | tcattggacctgattacaccgc                                                                                                 | 1.94                  |
| VL123                                                  | q-irg-5-Rev    | agcgaatcggatggagtacg                                                                                                   |                       |
| VL124                                                  | q-asp-14-Fw    | ttacctgacaccaccgg                                                                                                      | 1.99                  |
| VL125                                                  | q-asp-14-Rev   | aaggagtgcaaacacctggc                                                                                                   |                       |
| VL130                                                  | q-T21H3.1-Fw   | ttcggccttctgctaccag                                                                                                    | 1.98                  |
| VL131                                                  | q-T21H3.1-Rev  | tggcgtcgtgtatgggatg                                                                                                    |                       |
| VL132                                                  | q-K12H4.7-Fw   | acattcggagaggtcaatctg                                                                                                  | 1.94                  |
| VL133                                                  | q-K12H4.7-Rev  | tccgaactcagtgcaagtctg                                                                                                  |                       |
| VL206                                                  | q-nspc-14-Fw   | gcctctgccttcttctgc                                                                                                     | 1.94                  |
| VL207                                                  | q-nspc-14-Rev  | aagattcgccaccattgacacc                                                                                                 |                       |
| VL208                                                  | q-nspc-20-Fw   | tggtgcatcactgtgctgctg                                                                                                  | 1.90                  |
| VL209                                                  | q-nspc-20-Rev  | gcttcttctgctgggaatgttc                                                                                                 |                       |
| VL224                                                  | q-spp-5-Fw     | ccgataaggatgccaatgctc                                                                                                  | 1.98                  |
| VL225                                                  | q-spp-5-Rev    | gggtctacctgctgttgac                                                                                                    |                       |
| VL231                                                  | q-lys-7-Fw     | atccggtcgtgatctgattc                                                                                                   | 2.0                   |
| VL232                                                  | q-lys-7-Rev    | gattgtgactcatccctc                                                                                                     |                       |
| VL236                                                  | q-C14C6.5-Fw   | tggtgtcagtgactgcccag                                                                                                   | 2.0                   |
| VL237                                                  | q-C14C6.5-Rev  | agccacagtatccgcaggtc                                                                                                   |                       |
| VL406                                                  | q-F28B4.3-Fw1  | agaccatctctggtggaagcg                                                                                                  | 1.96                  |
| VL407                                                  | q-F28B4.3-Rev  | tctccattggtgctagcgg                                                                                                    |                       |
| VL409                                                  | qr-ttr-45-Fw1  | gcttggctgcaatgaggg                                                                                                     | 1.98                  |
| VL410                                                  | q-ttr-45-Rev   | ccgagtcctctccagagc                                                                                                     |                       |
| VL414                                                  | q-ZK1320.2-Fw  | aatgccgatggaacctggg                                                                                                    | 1.96                  |
| VL415                                                  | q-ZK1320.2-Rev | acatctgcactgttagttggtgg                                                                                                |                       |
| <b>Primers used for Poly(A) PCR tests (this study)</b> |                |                                                                                                                        |                       |
|                                                        | RA3-15N        | /5rApp/ctgacnnnnnnnnnnnnntggaattctcgg<br>gtccaagg/3ddC/ (5' pre-adenylated, with 15<br>nt unique molecular identifier) | 3' adaptor            |
|                                                        | RPI            | caagcagaagacggcatacagatnnnnnnngtactgga<br>gttcttggcaccgagaattcca                                                       | RNA PCR Rev<br>Primer |
| VL294                                                  | RP-uni-Rev     | caagcagaagacggcatacagat                                                                                                |                       |
| VL116                                                  | r-irg-4-Fw1    | tcggtcgaaaccaattccc                                                                                                    |                       |
| VL446                                                  | r-irg-4-Fw2    | gacaaacatcactgctcatcg                                                                                                  |                       |
| VL156                                                  | r-lys-7-Fw1    | actcctgccaactcaatgact                                                                                                  |                       |



|                                                                                           |                   |                                                                                                                       |                                                                                                                       |
|-------------------------------------------------------------------------------------------|-------------------|-----------------------------------------------------------------------------------------------------------------------|-----------------------------------------------------------------------------------------------------------------------|
| VL235                                                                                     | r-lys-7-Fw2       | aatgatacggcgaccaccgagatctacagttcagagttcta<br>cagtccgacgatcatgctggaggattgtgcaaggaa                                     |                                                                                                                       |
| VL212                                                                                     | r-clec-50-Fw1     | ggatctcgcgtggatcgga                                                                                                   |                                                                                                                       |
| VL213                                                                                     | r-clec-50-Fw2     | aatgatacggcgaccaccgagatctacagttcagagttcta<br>cagtccgacgatcctgcaagaagggatctattcatgca                                   |                                                                                                                       |
| VL164                                                                                     | r-F55G11.4-Fw1    | gtgaacgcgggagcacata                                                                                                   |                                                                                                                       |
| VL211                                                                                     | r-F55G11.4-Fw2    | aatgatacggcgaccaccgagatctacagttcagagttcta<br>cagtccgacgatcgtggcaaggctgattcacgttta                                     |                                                                                                                       |
| VL217                                                                                     | r-nspc-14-Fw1     | gagttctgtgctggtgcaatg                                                                                                 |                                                                                                                       |
| VL218                                                                                     | r-nspc-14-Fw2     | tgtgtatgttgcttcagtcgt                                                                                                 |                                                                                                                       |
| VL104                                                                                     | r-spp-3-Fw1       | gtcgacgctgaatgcaagaag                                                                                                 |                                                                                                                       |
| VL221                                                                                     | r-spp-3-Fw2       | cgctgcaccaagcttggatgtg                                                                                                |                                                                                                                       |
| VL165                                                                                     | r-asp-14-Fw1      | tcagcacaacggttatgaatgct                                                                                               |                                                                                                                       |
| VL216                                                                                     | r-asp-14-Fw2      | aatgatacggcgaccaccgagatctacagttcagagttcta<br>cagtccgacgatcactccagcgttctccaagattag                                     |                                                                                                                       |
| VL214                                                                                     | r-asm-2-Fw1       | ctcacctcaatcgtggtcgg                                                                                                  |                                                                                                                       |
| VL215                                                                                     | r-asm-2-Fw2       | aatgatacggcgaccaccgagatctacagttcagagttcta<br>cagtccgacgatcgcatttaacaaaatgattcac                                       |                                                                                                                       |
| VL222                                                                                     | r-ttr-25-Fw1      | cacagatgcaaccacgctcgg                                                                                                 |                                                                                                                       |
| VL223                                                                                     | r-ttr-25-Fw2      | ggagagggtactgattgattca                                                                                                |                                                                                                                       |
| VL268                                                                                     | r-snb-1-Fw1       | cggcgcgataagctgctgga                                                                                                  |                                                                                                                       |
| VL269                                                                                     | r-snb-1-Fw2       | cagactaacaacatgcctctc                                                                                                 |                                                                                                                       |
| VL449                                                                                     | r-C32H11.4-Fw1    | cggatctgaaactgcttcg                                                                                                   |                                                                                                                       |
| VL450                                                                                     | r-C32H11.4-Fw2    | cactcacgttctacggcgaa                                                                                                  |                                                                                                                       |
| VL096                                                                                     | r-ilys-5-Fw1      | tgccctggaagagatgtgctg                                                                                                 |                                                                                                                       |
| VL475                                                                                     | r-ilys-5-Fw2      | ggatactatgaagactgcgg                                                                                                  |                                                                                                                       |
| <b>Primers for RL northern blot probe preparation (this study)</b>                        |                   |                                                                                                                       |                                                                                                                       |
|                                                                                           | RL_Fw             | atgattactggtccacaatgg                                                                                                 |                                                                                                                       |
|                                                                                           | RL_Rev            | ggacacgctcaacaacgat                                                                                                   |                                                                                                                       |
| <b>Oligonucleotides used to generate <i>tent-5</i>(<i>rtt5</i>) strain by CRISPR/Cas9</b> |                   |                                                                                                                       |                                                                                                                       |
| VL311                                                                                     | tracrRNA-fragment | AAAAAGCACCGACTCGGTGCCACTTT<br>TTCAAGTTGATAACGGACTAgccttatttaa<br>cttgctatttctagctcta                                  |                                                                                                                       |
| VL312                                                                                     | crRNA01-tent-5    | gaaattaatacgaactcactataggg <u>GTTCAATTGGA</u><br><u>TCAGATGAC</u> gttttagagctagaaatagcaagttaaaa<br>taaggc             | Description:<br>underlined – T7<br>RNA promoter;<br>blue – 5'N20<br>guide RNA<br>sequence;<br>red – crRNA<br>scaffold |
| VL315                                                                                     | crRNA02-tent-5    | gaaattaatacgaactcactataggg <u>CTCATTCTGTT</u><br><u>TGTTCCGTG</u> gttttagagctagaaatagcaagttaaaa<br>taaggc             |                                                                                                                       |
| VL313                                                                                     | crRNA-dpy-10      | gaaattaatacgaactcactataggg <u>GCTACCATAGG</u><br><u>CACCACGAG</u> gttttagagctagaaatagcaagttaaaa<br>ataaggc            |                                                                                                                       |
| VL314                                                                                     | ssODN-dpy-10      | cacttgaactcaatacggcaagatgagaatgactgaaacc<br>gtaccgatcgggtgcctatggtagcggagcttcacatggctt<br>cagaccaacagcctat            | (94)                                                                                                                  |
| VL326                                                                                     | ssODN-tent-5      | ctgattttaaattattaatttaaaaaaaatttcagtggctcat<br>catggaacaacagatccaattgacctctcccccttcat<br>tctgtccacccttctcgaatacaaacac | upstream of the<br>start, down-<br>stream of the<br>stop codon of<br><i>tent-5</i> (d)                                |

| <b>Primers for genotyping of the previously published mouse lines (with reference)</b>     |                                                                                                                                                                                                                                                                                   |                                                                                                                                                                                                                                                                                                                                                                                                                                                                                                                                                                                                                                                                                                                                                                                                                                                                                                                                                                                                                                                                                                                                                    |                                                                                                          |
|--------------------------------------------------------------------------------------------|-----------------------------------------------------------------------------------------------------------------------------------------------------------------------------------------------------------------------------------------------------------------------------------|----------------------------------------------------------------------------------------------------------------------------------------------------------------------------------------------------------------------------------------------------------------------------------------------------------------------------------------------------------------------------------------------------------------------------------------------------------------------------------------------------------------------------------------------------------------------------------------------------------------------------------------------------------------------------------------------------------------------------------------------------------------------------------------------------------------------------------------------------------------------------------------------------------------------------------------------------------------------------------------------------------------------------------------------------------------------------------------------------------------------------------------------------|----------------------------------------------------------------------------------------------------------|
|                                                                                            | <i>Tent5c</i> KO-Fw                                                                                                                                                                                                                                                               | aggctctgactgagtcgtg                                                                                                                                                                                                                                                                                                                                                                                                                                                                                                                                                                                                                                                                                                                                                                                                                                                                                                                                                                                                                                                                                                                                | (21)                                                                                                     |
|                                                                                            | <i>Tent5c</i> KO-Rev                                                                                                                                                                                                                                                              | ttcctcaaaatccccgtaca                                                                                                                                                                                                                                                                                                                                                                                                                                                                                                                                                                                                                                                                                                                                                                                                                                                                                                                                                                                                                                                                                                                               |                                                                                                          |
|                                                                                            | <i>Tent5a</i> -3xFLAG-Fw                                                                                                                                                                                                                                                          | tggtaaacgagagtacggtg                                                                                                                                                                                                                                                                                                                                                                                                                                                                                                                                                                                                                                                                                                                                                                                                                                                                                                                                                                                                                                                                                                                               | (26)                                                                                                     |
|                                                                                            | <i>Tent5a</i> -3xFLAG-Rev                                                                                                                                                                                                                                                         | ctggctgctttttaccaaca                                                                                                                                                                                                                                                                                                                                                                                                                                                                                                                                                                                                                                                                                                                                                                                                                                                                                                                                                                                                                                                                                                                               |                                                                                                          |
|                                                                                            | <i>Tent5c</i> -3xFLAG-Fw                                                                                                                                                                                                                                                          | gacctgaacctcatctctc                                                                                                                                                                                                                                                                                                                                                                                                                                                                                                                                                                                                                                                                                                                                                                                                                                                                                                                                                                                                                                                                                                                                | (21)                                                                                                     |
|                                                                                            | <i>Tent5c</i> -3xFLAG-Rev                                                                                                                                                                                                                                                         | tatgggtccttttaggggtg                                                                                                                                                                                                                                                                                                                                                                                                                                                                                                                                                                                                                                                                                                                                                                                                                                                                                                                                                                                                                                                                                                                               |                                                                                                          |
| <b>sgRNAs, ssDNA and primers used for <i>Tent5a</i><sup>Flox/Flox</sup> cKO mouse line</b> |                                                                                                                                                                                                                                                                                   |                                                                                                                                                                                                                                                                                                                                                                                                                                                                                                                                                                                                                                                                                                                                                                                                                                                                                                                                                                                                                                                                                                                                                    |                                                                                                          |
|                                                                                            | sgRNA_LoxP_left                                                                                                                                                                                                                                                                   | tatgggcgtcacgatcggggagg                                                                                                                                                                                                                                                                                                                                                                                                                                                                                                                                                                                                                                                                                                                                                                                                                                                                                                                                                                                                                                                                                                                            | guide RNA sequence                                                                                       |
|                                                                                            | sgRNA_LoxP_right                                                                                                                                                                                                                                                                  | actaatgcgcgtgagtgtgtgg                                                                                                                                                                                                                                                                                                                                                                                                                                                                                                                                                                                                                                                                                                                                                                                                                                                                                                                                                                                                                                                                                                                             |                                                                                                          |
|                                                                                            | ssDNA donor                                                                                                                                                                                                                                                                       | GCTGGGCATTGGGGTCGGTGAGGGTTGGG<br>GGAGGAGGGCTACTATGGGCGTCACGATC<br>GGATAACTTCGTATAGCATAACATTATACG<br><u>AAGTTATGGatcc</u> AGGGGAAGCCCAGGCC<br>CTcgggggaccctgtccctcaccgcacacctctcgcgct<br>cccctaaatccactcttctcttagGACTGACCAAGGCC<br>AAGTGGCTTTCGGAGGGCACTACATGGCC<br>GAGGGCGAAGGGTACTTTGCCATGGCAG<br>AGGACGAGCTGACCGGCGGCCCTTACATC<br>CCCCTGGGTGGTGACTTCGGCGGCGGGCGG<br>CAGCAGCTTCGGCGACCGCTGCTCGGACT<br>ATTGCGAAAGCCCCACGGCGCACTGCAAT<br>GTGCTGAACTGGGAGCAAGTGCAGCGGTT<br>GGACGGCATTCTGAGCGAGACCATCCCGA<br>TCCACGGGCGCGCAACTTCCCCACGCTC<br>GAGCTGCAGCCAAGCCTGATTGTGAAGGT<br>GGTGAGGAGGCGCCTGGAAGAGAAGGGC<br>ATAGGTGTCCGCGACGTGCGCCTCAACGG<br>CTCAGCCGCCAGTCACGTCTGCACCAGG<br>ACAGTGGCCTAGGCTACAAGGACCTGGAC<br>CTCATCTTCTGCGCTGACCTGCGTGGGGA<br>AGAGGAGTTTCAGACTGTGAAGGACGTCG<br>TTCTGGATTGCCTGTTAGACTTCTTGCCCG<br>AAGGGGTGAACAAGGAGAAGATCACACC<br>GCTCACTCTCAAAGttaaagccacctgatggcttgggca<br>gagcaggggtggggagaaagcaagcccagcttccttgactgccg<br>tcagtatggccatagtgagttcgtttattttttatttttttcacg<br>agcgcaCTAATGCGCGTGAGTGGatccATAAC<br><u>TTCGTATAGCATAACATTATACGAAGTTAT</u><br>TGTGGAGTGTTTTAGTTTCCTGGGAGATC<br>CAGCGCCACAACCTCTGTGCTTCTCTCTG<br>CGTTTC | Description:<br><br><i>LoxP</i> sites are <u>underlined</u> .<br><br>BamHI sites are highlighted in grey |
|                                                                                            | <i>Tent5a</i> _cKO_sFw                                                                                                                                                                                                                                                            | actctcgttgtgctttcca                                                                                                                                                                                                                                                                                                                                                                                                                                                                                                                                                                                                                                                                                                                                                                                                                                                                                                                                                                                                                                                                                                                                | sequencing                                                                                               |
|                                                                                            | <i>Tent5a</i> _cKO_sRv                                                                                                                                                                                                                                                            | tcagttctgcttcaggctgc                                                                                                                                                                                                                                                                                                                                                                                                                                                                                                                                                                                                                                                                                                                                                                                                                                                                                                                                                                                                                                                                                                                               |                                                                                                          |
|                                                                                            | <i>Tent5a</i> _cKO_gFw                                                                                                                                                                                                                                                            | caagcctgatttgaaggtg                                                                                                                                                                                                                                                                                                                                                                                                                                                                                                                                                                                                                                                                                                                                                                                                                                                                                                                                                                                                                                                                                                                                | Mice genotyping                                                                                          |
|                                                                                            | <i>Tent5a</i> _cKO_gRv                                                                                                                                                                                                                                                            | aaggaagagaaggaaacgca                                                                                                                                                                                                                                                                                                                                                                                                                                                                                                                                                                                                                                                                                                                                                                                                                                                                                                                                                                                                                                                                                                                               |                                                                                                          |
|                                                                                            | For genotyping of <i>Tent5a</i> cKO mice, PCR products generated with <i>Tent5a</i> _cKO_gFw/gRv primers were digested with BamHI: <ul style="list-style-type: none"> <li>• WT: undigested 489 bp, digested 489 bp</li> <li>• cKO: undigested 527 bp, digested: 117 bp</li> </ul> |                                                                                                                                                                                                                                                                                                                                                                                                                                                                                                                                                                                                                                                                                                                                                                                                                                                                                                                                                                                                                                                                                                                                                    |                                                                                                          |
|                                                                                            | A_FloX_F1                                                                                                                                                                                                                                                                         | actctcgttgtgctttcca                                                                                                                                                                                                                                                                                                                                                                                                                                                                                                                                                                                                                                                                                                                                                                                                                                                                                                                                                                                                                                                                                                                                | BMDM genotyping                                                                                          |
|                                                                                            | A_FloX_F2                                                                                                                                                                                                                                                                         | tcagactgtgaaggacgtgc                                                                                                                                                                                                                                                                                                                                                                                                                                                                                                                                                                                                                                                                                                                                                                                                                                                                                                                                                                                                                                                                                                                               |                                                                                                          |
|                                                                                            | A_FloX_R1                                                                                                                                                                                                                                                                         | tcagttctgcttcaggctgc                                                                                                                                                                                                                                                                                                                                                                                                                                                                                                                                                                                                                                                                                                                                                                                                                                                                                                                                                                                                                                                                                                                               |                                                                                                          |

**Table S3. List of DNA constructs used in this study.**

| <b>pDNA</b>                                                                             | <b>Source</b>         | <b>Reference</b>                        |
|-----------------------------------------------------------------------------------------|-----------------------|-----------------------------------------|
| pCFJ90- <i>Pmyo-2::mCherry::unc-54utr</i>                                               | Dr. J. J. Ewbank      | Addgene plasmid # 19327; see ref. (119) |
| pCFJ104- <i>Pmyo-3::mCherry::unc-54utr</i>                                              | Dr. J. J. Ewbank      | Addgene Plasmid # 19328; see ref. (119) |
| pCFJ151                                                                                 | Dr. J. J. Ewbank      | Addgene Plasmid # 19330; see ref. (119) |
| pDD162 ( <i>Peft-3::Cas9</i> + Empty sgRNA)                                             | Dr. B. Goldstein      | Addgene Plasmid # 47549; see ref. (120) |
| pDD282                                                                                  | Dr. B. Goldstein      | Addgene Plasmid # 66823; see ref. (120) |
| pDD287                                                                                  | Dr. B. Goldstein      | Addgene Plasmid # 70685; see ref. (120) |
| pRH269- <i>Pmyo-2::GFP::unc-54utr</i>                                                   | Dr. K. Drabikowski    |                                         |
| pCIneo-NHA                                                                              | Dr. Witold Filipowicz | see ref. (104)                          |
| pRL-5BoxB                                                                               | Dr. Witold Filipowicz | see ref. (104)                          |
| pMD2.G                                                                                  | Dr. Didier Trono      | Addgene Plasmid # 12259                 |
| psPAX2                                                                                  | Dr. Didier Trono      | Addgene Plasmid # 12260                 |
| pCAG-Cre-IRES2-GFP                                                                      | Dr. Jacek Jaworski    | Addgene Plasmid # 26646; see ref. (121) |
| pCIneo-NHA- <i>tent-5<sup>WT</sup></i>                                                  | This work             |                                         |
| pCIneo-NHA- <i>tent-5<sup>MUT</sup></i> (MUT = D151A, D153A in <i>tent-5</i> isoform a) | This work             |                                         |
| pDD162- <i>sgRNA425</i> (pVL060)                                                        | This work             |                                         |
| pDD162- <i>sgRNA456</i> (pVL069)                                                        | This work             |                                         |
| pDD282- <i>tent-5::gfp::3xflag</i> (pVL062)                                             | This work             |                                         |
| pDD287- <i>vglN-1::mKate2::3xmyc</i> (pVL070)                                           | This work             |                                         |

**Table S4. Protein sequences used for the phylogenetic analysis.**

| <b>Organism</b>               | <b>Protein</b> | <b>WormBase or UniProt ID</b> |
|-------------------------------|----------------|-------------------------------|
| <i>Caenorhabditis elegans</i> |                |                               |
|                               | TENT-5         | F55A12.9.d1                   |
|                               | GLD-2          | ZC308.1c.1                    |
|                               | GLD-4          | ZK858.1                       |
|                               | USIP-1         | ZK863.4                       |
|                               | PUP-1/CID-1    | K10D2.3                       |
|                               | PUP-2          | K10D2.2                       |
|                               | PUP-3          | F59A3.9                       |
|                               | MUT-2          | K04F10.6b.1                   |
| <i>Homo sapiens</i>           |                |                               |
|                               | TENT5A         | Q96IP4                        |
|                               | TENT5B         | Q96A09                        |
|                               | TENT5C         | Q5VWP2                        |
|                               | TENT5D         | Q8NEK8                        |
|                               | TENT2          | Q6DFA8                        |
|                               | TENT4A         | Q5XG87                        |
|                               | TENT4B         | Q8NDF8                        |
|                               | TENT6          | Q9NVV4                        |
|                               | TENT1          | Q9H6E5                        |
|                               | TUT4           | Q5TAX3                        |
|                               | TUT7           | Q5VYS8                        |
| <i>Mus musculus</i>           |                |                               |
|                               | TENT5A         | A0A087WS27                    |
|                               | TENT5B         | Q8C152                        |
|                               | TENT5C         | Q5SSF7                        |
|                               | TENT5D         | B1ATX6                        |
|                               | TENT2          | Q91YI6                        |
|                               | TENT4A         | Q6PB75                        |
|                               | TENT4B         | Q68ED3                        |
|                               | TENT6          | Q9D0D3                        |
|                               | TENT1          | Q8R3F9                        |
|                               | TUT4           | B2RX14                        |
|                               | TUT7           | Q5BLK4                        |
| <i>Xenopus laevis</i>         |                |                               |
|                               | TENT2-a        | Q641A1                        |
|                               | TENT2-b        | Q6DFA8                        |
|                               | TENT4B         | A0A1L8GKF9                    |
|                               | TUT4           | A0A1L8GMG3                    |
|                               | TUT7           | A0A1L8HZ12                    |
|                               | TENT5A         | Q08AY7                        |
|                               | TENT5B         | Q66J95                        |
|                               | TENT5D         | A0A1L8F355                    |

**Data S1. (separate file)**

Differential expression of genes in age-synchronized L4-staged *tent-5(tm3504)* mutant worms compared to wild type grown on *E. coli* HB101 at 25°C (RNA-seq, DESeq2 results).

**Data S2. (separate file)**

Proteins abundance in age-synchronized L4-staged *tent-5(tm3504)* mutant compared to wild type worms grown on *E. coli* HB101 at 20°C (Mass Spectrometry).

**Data S3. (separate file)**

Differential expression of genes in *tent-5(tm3504)* mutant worms compared to wild type infected with *S. aureus* for 8h at 25°C (RNA-seq, DESeq2 results).

**Data S4. (separate file)**

Differential adenylation analysis on data from Direct RNA sequencing of RNA isolated from age-synchronized L4-staged *tent-5(tm3504)* and wild-type worms grown on *E. coli* HB101 at 25°C (DRS).

**Data S5. (separate file)**

Differential expression of genes in age-synchronized L4-staged *tent-5(tm3504)* mutant compared to wild-type worms grown on *E. coli* HB101 at 25°C (DRS, DESeq2 results).

**Data S6. (separate file)**

Differential adenylation and gene expression analyses on data from Direct RNA sequencing of RNA isolated from BMDM of *Tent5a<sup>Flox/Flox</sup> Tent5c<sup>-/-</sup>* and wild-type mice (DRS).

## REFERENCES AND NOTES

1. J. A. Hoffmann, F. C. Kafatos, C. A. Janeway, R. A. B. Ezekowitz, Phylogenetic perspectives in innate immunity. *Science* **284**, 1313–1318 (1999).
2. A. Iwasaki, R. Medzhitov, Control of adaptive immunity by the innate immune system. *Nat. Immunol.* **16**, 343–353 (2015).
3. K. Buchmann, Evolution of innate immunity: Clues from invertebrates via fish to mammals. *Front. Immunol.* **5**, 1–8 (2014).
4. D. H. Kim, J. J. Ewbank, Signaling in the innate immune response. *WormBook* **2018**, 1–35 (2018).
5. J. E. Irazoqui, J. M. Urbach, F. M. Ausubel, Evolution of host innate defence: Insights from *Caenorhabditis elegans* and primitive invertebrates. *Nat. Rev. Immunol.* **10**, 47–58 (2010).
6. G. Gasteiger, A. D’osualdo, D. A. Schubert, A. Weber, E. M. Bruscia, D. Hartl, Cellular innate immunity: An old game with new players. *J. Innate Immun.* **9**, 111–125 (2017).
7. S. Carpenter, E. P. Ricci, B. C. Mercier, M. J. Moore, K. A. Fitzgerald, Post-transcriptional regulation of gene expression in innate immunity. *Nat. Rev. Immunol.* **14**, 361–376 (2014).
8. Y. Shi, J. L. Manley, The end of the message: Multiple protein–RNA interactions define the mRNA polyadenylation site. *Genes Dev.* **29**, 889–897 (2015).
9. J. Neve, R. Patel, Z. Wang, A. Louey, A. M. Furger, Cleavage and polyadenylation: Ending the message expands gene regulation. *RNA Biol.* **14**, 865–890 (2017).
10. A. L. Jalkanen, S. J. Coleman, J. Wilusz, Determinants and implications of mRNA poly(A) tail size—Does this protein make my tail look big? *Semin. Cell Dev. Biol.* **34**, 24–32 (2014).
11. Y. Bin Yan, Deadenylation: Enzymes, regulation, and functional implications. *Wiley Interdiscip. Rev. RNA* **5**, 421–443 (2014).

12. G. Martin, W. Keller, RNA-specific ribonucleotidyl transferases. *RNA* **13**, 1834–1849 (2007).
13. S. Yu, V. N. Kim, A tale of non-canonical tails: Gene regulation by post-transcriptional RNA tailing. *Nat. Rev. Mol. Cell Biol.* **21**, 542–556 (2020).
14. V. Liudkovska, A. Dziembowski, Functions and mechanisms of RNA tailing by metazoan terminal nucleotidyltransferases. *Wiley Interdiscip. Rev. RNA* **12**, e1622 (2021).
15. J. H. Kim, J. D. Richter, Opposing polymerase-deadenylase activities regulate cytoplasmic polyadenylation. *Mol. Cell* **24**, 173–183 (2006).
16. K. W. Kim, T. L. Wilson, J. Kimble, GLD-2/RNP-8 cytoplasmic poly(A) polymerase is a broad-spectrum regulator of the oogenesis program. *Proc. Natl. Acad. Sci. U.S.A.* **107**, 17445–17450 (2010).
17. M. Nusch, A. Yeroslaviz, C. R. Eckmann, Stage-specific combinations of opposing poly(A) modifying enzymes guide gene expression during early oogenesis. *Nucleic Acids Res. Res.* **47**, 10881–10893 (2019).
18. E. K. Jae, E. Drier, S. A. Barbee, M. Ramaswami, J. C. P. Yin, M. Wickens, GLD2 poly(A) polymerase is required for long-term memory. *Proc. Natl. Acad. Sci. U.S.A.* **105**, 14644–14649 (2008).
19. T. Udagawa, S. A. Swanger, K. Takeuchi, J. H. Kim, V. Nalavadi, J. Shin, L. J. Lorenz, R. S. Zukin, G. J. Bassell, J. D. Richter, Bidirectional control of mRNA translation and synaptic plasticity by the cytoplasmic polyadenylation complex. *Mol. Cell* **47**, 253–266 (2012).
20. K. Kuchta, A. Muszewska, L. Knizewski, K. Steczkiewicz, L. S. Wyrwicz, K. Pawlowski, L. Rychlewski, K. Ginalski, FAM46 proteins are novel eukaryotic non-canonical poly(A) polymerases. *Nucleic Acids Res.* **44**, 3534–3548 (2016).

21. S. Mroczek, J. Chlebowska, T. M. Kuliński, O. Gewartowska, J. Gruchota, D. Cysewski, V. Liudkovska, E. Borsuk, D. Nowis, A. Dziembowski, The non-canonical poly(A) polymerase *FAM46C* acts as an onco-suppressor in multiple myeloma. *Nat. Commun.* **8**, 619 (2017).
22. Y. X. Zhu, C. X. Shi, L. A. Bruins, P. Jedlowski, X. Wang, K. M. Kortüm, M. Luo, J. M. Ahmann, E. Braggio, A. K. Stewart, Loss of *FAM46C* promotes cell survival in myeloma. *Cancer Res.* **77**, 4317–4327 (2017).
23. A. Bilska, M. Kusio-kobia, P. S. Krawczyk, O. Gewartowska, B. Tarkowski, K. Koby, D. Nowis, J. Golab, J. Gruchota, E. Borsuk, A. Dziembowski, S. Mroczek, Immunoglobulin expression and the humoral immune response is regulated by the non-canonical poly(A) polymerase *TENT5C*. *Nat. Commun.* **11**, 1–17 (2020).
24. A. B. Herrero, D. Quwaider, L. A. Corchete, M. V. Mateos, R. García-Sanz, N. C. Gutiérrez, *FAM46C* controls antibody production by the polyadenylation of immunoglobulin mRNAs and inhibits cell migration in multiple myeloma. *J. Cell. Mol. Med.* **00**, 1–12 (2020).
25. J. L. Hu, H. Liang, H. Zhang, M. Z. Yang, W. Sun, P. Zhang, L. Luo, J. X. Feng, H. Bai, F. Liu, T. Zhang, J. Y. Yang, Q. Gao, Y. Long, X. Y. Ma, Y. Chen, Q. Zhong, B. Yu, S. Liao, Y. Wang, Y. Zhao, M. S. Zeng, N. Cao, J. Wang, W. Chen, H. T. Yang, S. Gao, *FAM46B* is a prokaryotic-like cytoplasmic poly(A) polymerase essential in human embryonic stem cells. *Nucleic Acids Res.* **48**, 2733–2748 (2020).
26. O. Gewartowska, G. Aranaz-Novaliches, P. S. Krawczyk, S. Mroczek, M. Kusio-Kobiałka, B. Tarkowski, F. Spoutil, O. Benada, O. Kofroňová, P. Szwedziak, D. Cysewski, J. Gruchota, M. Szpila, A. Chlebowski, R. Sedlacek, J. Prochazka, A. Dziembowski, Cytoplasmic polyadenylation by *TENT5A* is required for proper bone formation. *Cell Rep.* **35**, 109015 (2021).
27. J. Collier, M. Wickens, Tethered function assays: An adaptable approach to study RNA regulatory proteins. *Methods Enzymol.* **429**, 299–321 (2007).



28. E. R. Troemel, S. W. Chu, V. Reinke, S. S. Lee, F. M. Ausubel, D. H. Kim, p38 MAPK regulates expression of immune response genes and contributes to longevity in *C. elegans*. *PLoS Genet.* **2**, 1725–1739 (2006).
29. T. Roeder, M. Stanisak, C. Gelhaus, I. Bruchhaus, J. Grötzinger, M. Leippe, Caenopores are antimicrobial peptides in the nematode *Caenorhabditis elegans* instrumental in nutrition and immunity. *Dev. Comp. Immunol.* **34**, 203–209 (2010).
30. H. Schulenburg, M. P. Hoepfner, J. Weiner, E. Bornberg-Bauer, Specificity of the innate immune system and diversity of C-type lectin domain (CTLD) proteins in the nematode *Caenorhabditis elegans*. *Immunobiology* **213**, 237–250 (2008).
31. I. Engelmann, A. Griffon, L. Tichit, F. Montañana-Sanchis, G. Wang, V. Reinke, R. H. Waterston, L. D. W. Hillier, J. J. Ewbank, A comprehensive analysis of gene expression changes provoked by bacterial and fungal infection in *C. elegans*. *PLOS ONE* **6**, e19055 (2011).
32. C. Taffoni, N. Pujol, Mechanisms of innate immunity in *C. elegans* epidermis. *Tissue Barriers* **3**, 1–8 (2015).
33. J. H. Thomas, Concerted evolution of two novel protein families in *Caenorhabditis species*. *Genetics* **172**, 2269–2281 (2006).
34. D. Wong, D. Bazopoulou, N. Pujol, N. Tavernarakis, J. J. Ewbank, Genome-wide investigation reveals pathogen-specific and shared signatures in the response of *Caenorhabditis elegans* to infection. *Genome Biol.* **8**, R194 (2007).
35. G. V. Mallo, C. L. Kurz, C. Couillault, N. Pujol, S. Granjeaud, Y. Kohara, J. J. Ewbank, Inducible antibacterial defense system in *C. elegans*. *Curr. Biol.* **12**, 1209–1214 (2002).
36. C. T. Murphy, S. A. McCarroll, C. I. Bargmann, A. Fraser, R. S. Kamath, J. Ahringer, H. Li, C. Kenyon, Genes that act downstream of DAF-16 to influence the lifespan of *Caenorhabditis elegans*. *Nature* **424**, 277–283 (2003).

37. O. Visvikis, N. Ihuegbu, S. A. Labed, L. G. Luhachack, A. M. F. Alves, A. C. Wollenberg, L. M. Stuart, G. D. Stormo, J. E. Irazoqui, Innate host defense requires TFEB-mediated transcription of cytoprotective and antimicrobial genes. *Immunity* **40**, 896–909 (2014).
38. A. Sinha, R. Rae, I. Iatsenko, R. J. Sommer, System wide analysis of the evolution of innate immunity in the nematode model species *Caenorhabditis elegans* and *Pristionchus pacificus*. *PLOS ONE* **7**, e44255 (2012).
39. S. Alper, S. J. McBride, B. Lackford, J. H. Freedman, D. A. Schwartz, Specificity and complexity of the *Caenorhabditis elegans* innate immune response. *Mol. Cell. Biol.* **27**, 5544–5553 (2007).
40. W. Yang, K. Dierking, P. C. Rosenstiel, H. Schulenburg, GATA transcription factor as a likely key regulator of the *Caenorhabditis elegans* innate immune response against gut pathogens. *Fortschr. Zool.* **119**, 244–253 (2016).
41. E. A. Evans, T. Kawli, M. W. Tan, *Pseudomonas aeruginosa* suppresses host immunity by activating the DAF-2 insulin-like signaling pathway in *Caenorhabditis elegans*. *PLOS Pathog.* **4**, e1000175 (2008).
42. R. P. Shivers, M. J. Youngman, D. H. Kim, Transcriptional responses to pathogens in *Caenorhabditis elegans*. *Curr. Opin. Microbiol.* **11**, 251–256 (2008).
43. X. X. Lin, I. Sen, G. E. Janssens, X. Zhou, B. R. Fonslow, D. Edgar, N. Stroustrup, P. Swoboda, J. R. Yates, G. Ruvkun, C. G. Riedel, DAF-16/FOXO and HLH-30/TFEB function as combinatorial transcription factors to promote stress resistance and longevity. *Nat. Commun.* **9**, 4400 (2018).
44. D. Gems, D. L. Riddle, Genetic, behavioral and environmental determinants of male longevity in *Caenorhabditis elegans*. *Genetics* **154**, 1597–1610 (2000).
45. D. Garigan, A. L. Hsu, A. G. Fraser, R. S. Kamath, J. Abringet, C. Kenyon, Genetic analysis of tissue aging in *Caenorhabditis elegans*: A role for heat-shock factor and bacterial proliferation. *Genetics* **161**, 1101–1112 (2002).

46. J. E. Irazoqui, E. R. Troemel, R. L. Feinbaum, L. G. Luhachack, B. O. Cezairliyan, F. M. Ausubel, Distinct pathogenesis and host responses during infection of *C. elegans* by *P. aeruginosa* and *S. aureus*. *PLOS Pathog.* **6**, 1–24 (2010).
47. C. L. Kurz, S. Chauvet, E. Andrès, M. Aurouze, I. Vallet, G. P. F. Michel, M. Uh, J. Celli, A. Filloux, S. De Bentzmann, I. Steinmetz, J. A. Hoffmann, B. B. Finlay, J.-P. Gorvel, D. Ferrandon, J. J. Ewbank, Virulence factors of the human opportunistic pathogen *Serratia marcescens* identified by in vivo screening. *EMBO J.* **22**, 1451–1460 (2003).
48. C. Couillault, J. J. Ewbank, Diverse bacteria are pathogens of *Caenorhabditis elegans*. *Infect. Immun.* **70**, 4705–4707 (2002).
49. M. F. Palominos, A. Calixto, Quantification of bacteria residing in *Caenorhabditis elegans* intestine. *Bio Protoc.* **10**, 1–12 (2020).
50. F. Rodriguez Ayala, S. Cogliati, C. Bauman, C. Leñini, M. Bartolini, J. Villalba, F. Argañaraz, R. Grau, Culturing bacteria from *Caenorhabditis elegans* gut to assess colonization proficiency. *Bio Protoc.* **7**, e2345 (2017).
51. M. E. Hoinville, A. C. Wollenberg, Changes in *Caenorhabditis elegans* gene expression following exposure to *Photobacterium luminescens* strain TT01. *Dev. Comp. Immunol.* **82**, 165–176 (2018).
52. I. Legnini, J. Alles, N. Karaïskos, S. Ayoub, N. Rajewsky, FLAM-seq: Full-length mRNA sequencing reveals principles of poly(A) tail length control. *Nat. Methods* **16**, 879–886 (2019).
53. S. A. Lima, L. B. Chipman, A. L. Nicholson, Y. H. Chen, B. A. Yee, G. W. Yeo, J. Coller, A. E. Pasquinelli, Short poly(A) tails are a conserved feature of highly expressed genes. *Nat. Struct. Mol. Biol.* **24**, 1057–1063 (2017).
54. J. Tao, Y. Hao, X. Li, H. Yin, X. Nie, J. Zhang, B. Xu, Q. Chen, B. Li, Systematic identification of housekeeping genes possibly used as references in *Caenorhabditis elegans* by large-scale data integration. *Cell* **9**, 786 (2020).

55. C. Y. Ewald, J. N. Landis, J. P. Abate, C. T. Murphy, T. K. Blackwell, Dauer-independent insulin/IGF-1-signalling implicates collagen remodelling in longevity. *Nature* **519**, 97–101 (2015).
56. D. Sellegounder, Y. Liu, P. Wibisono, C. H. Chen, D. Leap, J. Sun, Neuronal GPCR NPR-8 regulates *C. elegans* defense against pathogen infection. *Sci. Adv.* **5**, eaaw4717 (2019).
57. Y. Liu, D. Martinez-Martinez, C. L. Essmann, M. R. Cruz, F. Cabreiro, D. A. Garsin, Transcriptome analysis of *Caenorhabditis elegans* lacking heme peroxidase SKPO-1 reveals an altered response to *Enterococcus faecalis*. *G3 (Bethesda)* **11**, jkaa055 (2021).
58. I. Gallotta, A. Sandhu, M. Peters, M. Haslbeck, R. Jung, S. Agilkaya, J. L. Blersch, C. Rödelsperger, W. Röseler, C. Huang, R. J. Sommer, D. C. David, Extracellular proteostasis prevents aggregation during pathogenic attack. *Nature* **584**, 410–414 (2020).
59. T. L. Bailey, DREME: Motif discovery in transcription factor ChIP-seq data. *Bioinformatics* **27**, 1653–1659 (2011).
60. J. Suh, H. Hutter, A survey of putative secreted and transmembrane proteins encoded in the *C. elegans* genome. *BMC Genomics* **13**, 333 (2012).
61. J. D. McGhee, The *Caenorhabditis elegans* intestine. *Wiley Interdiscip. Rev. Dev. Biol.* **2**, 347–367 (2013).
62. C. Coburn, D. Gems, The mysterious case of the *C. elegans* gut granule: Death anthranilic acid and the kynurenine pathway. *Front. Genet.* **4**, 151 (2013).
63. B. J. Thomas, I. E. Wight, W. Y. Y. Chou, M. Moreno, Z. Dawson, A. Homayouni, H. Huang, H. Kim, H. Jia, J. R. Buland, J. A. Wambach, F. S. Cole, S. C. Pak, G. A. Silverman, C. J. Luke, CemOrange2 fusions facilitate multifluorophore subcellular imaging in *C. elegans*. *PLOS ONE* **14**, 1–25 (2019).
64. C. Fucci, M. Resnati, E. Riva, T. Perini, E. Ruggieri, U. Orfanelli, F. Paradiso, F. Cremasco, A. Raimondi, E. Pasqualetto, M. Nuvolone, L. Rampoldi, S. Cenci, E. Milan, The interaction

of the tumor suppressor FAM46C with p62 and FNDC3 proteins Integrates protein and secretory homeostasis. *Cell Rep.* **32**, 108162 (2020).

65. N. Manfrini, M. Mancino, A. Miluzio, S. Oliveto, M. Balestra, P. Calamita, R. Alfieri, R. L. Rossi, M. Sassoe-Pognetto, C. Salio, A. Cuomo, T. Bonaldi, M. Manfredi, E. Marengo, E. Ranzato, S. Martinotti, D. Cittaro, G. Tonon, S. Biffo, FAM46C and FNDC3A are multiple myeloma tumor suppressors that act in concert to impair clearing of protein aggregates and autophagy. *Cancer Res.* **80**, 4693–4706 (2020).
66. R. A. Zabinsky, B. M. Weum, M. Cui, M. Han, RNA binding protein vigilin collaborates with miRNAs to regulate gene expression for *Caenorhabditis elegans* larval development. *G3 (Bethesda)* **7**, 2511–2518 (2017).
67. Y. S. Ooi, K. Majzoub, R. A. Flynn, M. A. Mata, J. Diep, J. K. Li, N. van Buuren, N. Rumachik, A. G. Johnson, A. S. Puschnik, C. D. Marceau, L. Mlera, J. M. Grabowski, K. Kirkegaard, M. E. Bloom, P. Sarnow, C. R. Bertozzi, J. E. Carette, An RNA-centric dissection of host complexes controlling flavivirus infection. *Nat. Microbiol.* **4**, 2369–2382 (2019).
68. P. J. Murray, Macrophage polarization. *Annu. Rev. Physiol.* **79**, 541–566 (2017).
69. M. Benoit, B. Desnues, J.-L. Mege, Macrophage polarization in bacterial infections. *J. Immunol.* **181**, 3733–3739 (2008).
70. C. Zheng, Y. C. Ouyang, B. Jiang, X. Lin, J. Chen, M. Z. Dong, X. Zhuang, S. Yuan, Q. Y. Sun, C. Han, Non-canonical RNA polyadenylation polymerase FAM46C is essential for fastening sperm head and flagellum in mice. *Biol. Reprod.* **100**, 1673–1685 (2019).
71. T. Ganz, V. Gabayan, H.-I. Liao, L. Liu, A. Oren, T. Graf, A. M. Cole, Increased inflammation in lysozyme M-deficient mice in response to *Micrococcus luteus* and its peptidoglycan. *Blood* **101**, 2388–2392 (2003).

72. P. Markart, T. R. Korfhagen, T. E. Weaver, H. T. Akinbi, Mouse lysozyme M is important in pulmonary host defense against *Klebsiella pneumoniae* infection. *Am. J. Respir. Crit. Care Med.* **169**, 454–458 (2004).
73. H. T. Akinbi, R. Epaud, H. Bhatt, T. E. Weaver, Bacterial killing is enhanced by expression of lysozyme in the lungs of transgenic mice. *J. Immunol.* **165**, 5760–5766 (2000).
74. A. M. Cole, D. R. Thapa, V. Gabayan, H.-I. Liao, L. Liu, T. Ganz, Decreased clearance of *Pseudomonas aeruginosa* from airways of mice deficient in lysozyme M. *J. Leukoc. Biol.* **78**, 1081–1085 (2005).
75. E. del Cerro-Vadillo, F. Madrazo-Toca, E. Carrasco-Marín, L. Fernandez-Prieto, C. Beck, F. Leyva-Cobián, P. Saftig, C. Alvarez-Dominguez, Cutting edge: A novel nonoxidative phagosomal mechanism exerted by cathepsin-D controls *Listeria monocytogenes* intracellular growth. *J. Immunol.* **176**, 1321–1325 (2006).
76. Q. Fu, J. Yuan, L. Wang, H. Ran, F. Li, F. Liu, J. Zhang, W. Liu, W. Huang, Y. Huang, X. Xia, Proteomic analysis of murine macrophages mitochondria and lysosomes reveal Cathepsin D as a potential broad-spectrum antimicrobial protein. *J. Proteomics* **223**, 103821 (2020).
77. S.-D. Ha, A. Martins, K. Khazaie, J. Han, B. M. C. Chan, S. O. Kim, Cathepsin B is involved in the trafficking of TNF- $\alpha$ -containing vesicles to the plasma membrane in macrophages. *J. Immunol.* **181**, 690–697 (2008).
78. R. Elling, J. Chan, K. A. Fitzgerald, Emerging role of long noncoding RNAs as regulators of innate immune cell development and inflammatory gene expression. *Eur. J. Immunol.* **46**, 504–512 (2016).
79. M. K. Atianand, D. R. Caffrey, K. A. Fitzgerald, Immunobiology of long noncoding RNAs. *Annu. Rev. Immunol.* **35**, 177–198 (2017).
80. J. Blin, K. A. Fitzgerald, Perspective: The RNA exosome, cytokine gene regulation and links to autoimmunity. *Cytokine* **74**, 175–180 (2015).

81. C. Kew, W. Huang, J. Fischer, R. Ganesan, N. Robinson, A. Antebi, Evolutionarily conserved regulation of immunity by the splicing factor RNP-6/PUF60. *eLife* **9**, 1–23 (2020).
82. A. O. Olaitan, A. Aballay, Non-proteolytic activity of 19S proteasome subunit RPT-6 regulates GATA transcription during response to infection. *PLoS Genet.* **14**, e1007693 (2018).
83. V. Tiku, C. Kew, P. Mehrotra, R. Ganesan, N. Robinson, A. Antebi, Nucleolar fibrillarin is an evolutionarily conserved regulator of bacterial pathogen resistance. *Nat. Commun.* **9**, 1–10 (2018).
84. C.-W. Wu, K. Wimberly, A. Pietras, W. Dodd, M. B. Atlas, K. P. Choe, RNA processing errors triggered by cadmium and integrator complex disruption are signals for environmental stress. *BMC Biol.* **17**, 56 (2019).
85. R. Kaletsky, R. S. Moore, G. D. Vrla, L. R. Parsons, Z. Gitai, C. T. Murphy, *C. elegans* interprets bacterial non-coding RNAs to learn pathogenic avoidance. *Nature* **586**, 445–451 (2020).
86. B. A. Kudlow, L. Zhang, M. Han, Systematic analysis of tissue-restricted miRISCs reveals a broad role for microRNAs in suppressing basal activity of the *C. elegans* pathogen response. *Mol. Cell* **46**, 530–541 (2012).
87. Z. Ren, V. R. Ambros, *Caenorhabditis elegans* microRNAs of the let-7 family act in innate immune response circuits and confer robust developmental timing against pathogen stress. *Proc. Natl. Acad. Sci. U.S.A.* **112**, E2366–E2375 (2015).
88. L. Sun, L. Zhi, S. Shakoor, K. Liao, D. Wang, microRNAs involved in the control of innate immunity in Candida infected *Caenorhabditis elegans*. *Sci. Rep.* **6**, 36036 (2016).
89. J. Le Pen, H. Jiang, T. Di Domenico, E. Kneuss, J. Kosalka, C. Leung, M. Morgan, C. Much, K. L. M. Rudolph, A. J. Enright, D. O’Carroll, D. Wang, E. A. Miska, Terminal uridylyltransferases target RNA viruses as part of the innate immune system. *Nat. Struct. Mol. Biol.* **25**, 778–786 (2018).

90. C. E. Richardson, T. Kooistra, D. H. Kim, An essential role for XBP-1 in host protection against immune activation in *C. elegans*. *Nature* **463**, 1092–1095 (2010).
91. E. J. Tillman, C. E. Richardson, D. J. Cattie, K. C. Reddy, N. J. Lehrbach, R. Droste, G. Ruvkun, D. H. Kim, Endoplasmic reticulum homeostasis is modulated by the forkhead transcription factor FKH-9 during infection of *Caenorhabditis elegans*. *Genetics* **210**, 1329–1337 (2018).
92. E. Vidak, U. Javoršek, M. Vizovišek, B. Turk, Cysteine cathepsins and their extracellular roles: Shaping the microenvironment. *Cell* **8**, 264 (2019).
93. K. Lasocki, A. A. Bartosik, J. Mierzejewska, C. M. Thomas, G. Jagura-Burdzy, Deletion of the parA (soj) homologue in *Pseudomonas aeruginosa* causes ParB instability and affects growth rate, chromosome segregation, and motility. *J. Bacteriol.* **189**, 5762–5772 (2007).
94. A. Paix, A. Folkmann, D. Rasoloson, G. Seydoux, High efficiency, homology-directed genome editing in *Caenorhabditis elegans* using CRISPR-Cas9 ribonucleoprotein complexes. *Genetics* **201**, 47–54 (2015).
95. D. J. Dickinson, A. M. Pani, J. K. Heppert, C. D. Higgins, B. Goldstein, Streamlined genome engineering with a self-excising drug selection cassette. *Genetics* **200**, 1035–1049 (2015).
96. M. R. Green, J. Sambrook, *Molecular Cloning: A Laboratory Manual* (CSH Press, ed. 4, 2012).
97. J. Y. Jeong, H. S. Yim, J. Y. Ryu, H. S. Lee, J. H. Lee, D. S. Seen, S. G. Kang, One-step sequence- and ligation-independent cloning as a rapid and versatile cloning method for functional genomics Studies. *Appl. Environ. Microbiol.* **78**, 5440–5443 (2012).
98. M. Z. Li, S. J. Elledge, SLIC: A method for sequence- and ligation-independent cloning. *Methods Mol. Biol.* **852**, 51–59 (2012).
99. D. Graczyk, R. J. White, K. M. Ryan, Involvement of RNA polymerase III in immune responses. *Mol. Cell. Biol.* **35**, 1848–1859 (2015).



100. J. Pei, B. H. Kim, N. V. Grishin, PROMALS3D: A tool for multiple protein sequence and structure alignments. *Nucleic Acids Res.* **36**, 2295–2300 (2008).
101. R. C. Edgar, MUSCLE: A multiple sequence alignment method with reduced time and space complexity. *BMC Bioinformatics* **5**, 113 (2004).
102. I. Letunic, P. Bork, Interactive tree of life (iTOL) v4: Recent updates and new developments. *Nucleic Acids Res.* **47**, W256–W259 (2019).
103. J. Schindelin, I. Arganda-Carreras, E. Frise, V. Kaynig, M. Longair, T. Pietzsch, S. Preibisch, C. Rueden, S. Saalfeld, B. Schmid, J.-Y. Tinevez, D. J. White, V. Hartenstein, K. Eliceiri, P. Tomancak, A. Cardona, Fiji: An open-source platform for biological-image analysis. *Nat. Methods* **9**, 676–682 (2012).
104. M. Chekulaeva, H. Mathys, J. T. Zipprich, J. Attig, M. Colic, R. Parker, W. Filipowicz, miRNA repression involves GW182-mediated recruitment of CCR4-NOT through conserved W-containing motifs. *Nat. Struct. Mol. Biol.* **18**, 1218–1226 (2011).
105. M. Martin, Cutadapt removes adapter sequences from high-throughput sequencing reads. *EMBnet. J.* **17**, 10 (2011).
106. A. Dobin, C. A. Davis, F. Schlesinger, J. Drenkow, C. Zaleski, S. Jha, P. Batut, M. Chaisson, T. R. Gingeras, STAR: Ultrafast universal RNA-seq aligner. *Bioinformatics* **29**, 15–21 (2013).
107. Y. Liao, G. K. Smyth, W. Shi, FeatureCounts: An efficient general purpose program for assigning sequence reads to genomic features. *Bioinformatics* **30**, 923–930 (2014).
108. M. I. Love, W. Huber, S. Anders, Moderated estimation of fold change and dispersion for RNA-seq data with DESeq2. *Genome Biol.* **15**, 550 (2014).
109. D. Angeles-Albores, R. Y. Raymond, J. Chan, P. W. Sternberg, Tissue enrichment analysis for *C. elegans* genomics. *BMC Bioinformatics* **17**, 366 (2016).

110. A. D. Holdorf, D. P. Higgins, A. C. Hart, P. R. Boag, G. J. Pazour, A. J. M. Walhout, A. K. Walker, WormCat: An online tool for annotation and visualization of *Caenorhabditis elegans* genome-scale data. *Genetics* **214**, 279–294 (2020).
111. H. Li, Minimap2: Pairwise alignment for nucleotide sequences. *Bioinformatics* **34**, 3094–3100 (2018).
112. R. E. Workman, A. D. Tang, P. S. Tang, M. Jain, J. R. Tyson, R. Razaghi, P. C. Zuzarte, T. Gilpatrick, A. Payne, J. Quick, N. Sadowski, N. Holmes, J. G. de Jesus, K. L. Jones, C. M. Soulette, T. P. Snutch, N. Loman, B. Paten, M. Loose, J. T. Simpson, H. E. Olsen, A. N. Brooks, M. Akeson, W. Timp, Nanopore native RNA sequencing of a human poly(A) transcriptome. *Nat. Methods* **16**, 1–37 (2019).
113. U. Raudvere, L. Kolberg, I. Kuzmin, T. Arak, P. Adler, H. Peterson, J. Vilo, g:Profiler: A web server for functional enrichment analysis and conversions of gene lists (2019 update). *Nucleic Acids Res.* **47**, W191–W198 (2019).
114. A. R. Quinlan, I. M. Hall, BEDTools: A flexible suite of utilities for comparing genomic features. *Bioinformatics* **26**, 841–842 (2010).
115. J. R. Wiśniewski, P. Ostasiewicz, M. Mann, High recovery FASP applied to the proteomic analysis of microdissected formalin fixed paraffin embedded cancer tissues retrieves known colon cancer markers. *J. Proteome Res.* **10**, 3040–3049 (2011).
116. J. Cox, M. Mann, MaxQuant enables high peptide identification rates, individualized p.p.b.-range mass accuracies and proteome-wide protein quantification. *Nat. Biotechnol.* **26**, 1367–1372 (2008).
117. R Core Team, R: A language and environment for statistical computing (2020).
118. Y. Perez-Riverol, A. Csordas, J. Bai, M. Bernal-Llinares, S. Hewapathirana, D. J. Kundu, A. Inuganti, J. Griss, G. Mayer, M. Eisenacher, E. Pérez, J. Uszkoreit, J. Pfeuffer, T. Sachsenberg, Ş. Yilmaz, S. Tiwary, J. Cox, E. Audain, M. Walzer, A. F. Jarnuczak, T.

Ternent, A. Brazma, J. A. Vizcaíno, The PRIDE database and related tools and resources in 2019: Improving support for quantification data. *Nucleic Acids Res.* **47**, D442–D450 (2019).

119. C. Frøkjaer-Jensen, M. W. Davis, C. E. Hopkins, B. J. Newman, J. M. Thummel, S.-P. Olesen, M. Grunnet, E. M. Jorgensen, Single-copy insertion of transgenes in *Caenorhabditis elegans*. *Nat. Genet.* **40**, 1375–1383 (2008).
120. D. J. Dickinson, J. D. Ward, D. J. Reiner, B. Goldstein, Engineering the *Caenorhabditis elegans* genome using Cas9-triggered homologous recombination. *Nat. Methods* **10**, 1028–1034 (2013).
121. G. J. Woodhead, C. A. Mutch, E. C. Olson, A. Chenn, Cell-autonomous  $\beta$ -catenin signaling regulates cortical precursor proliferation. *J. Neurosci.* **26**, 12620–12630 (2006).
